# Supplementary material for: Unprecedented spiro-annelated sugar isoureas, guanidines and amidines as new families of glycosidase inhibitors
Source: Royal Society of Chemistry journal article supplement (doi:10.1039/c2ra21561f), 2012-01-01
Supplement: c2ra21561f.pdf [file c2ra21561f.pdf]

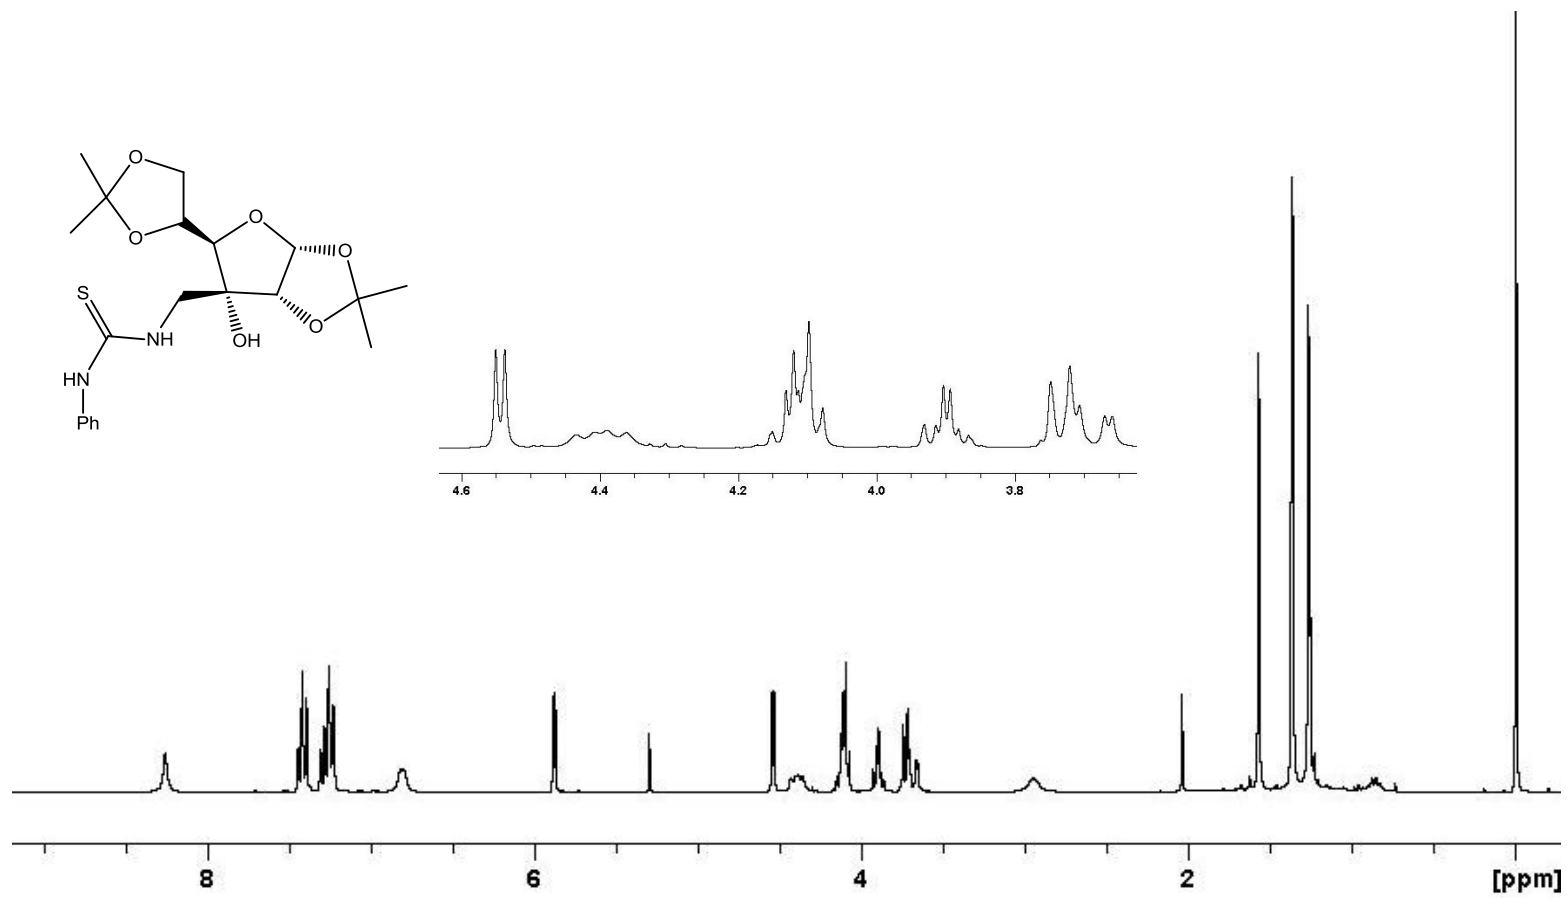

$^1\text{H-NMR}$  ( $\text{CDCl}_3$ , 300 MHz) of **15a**

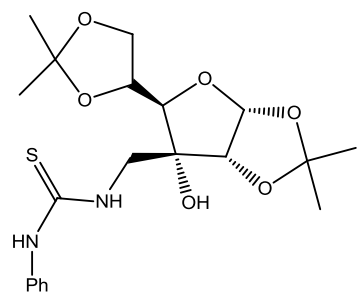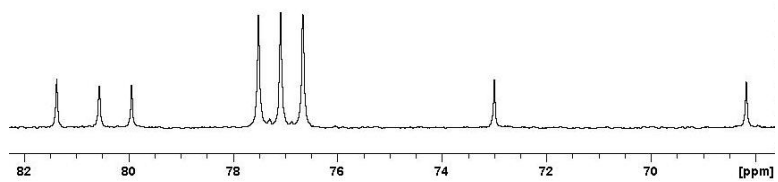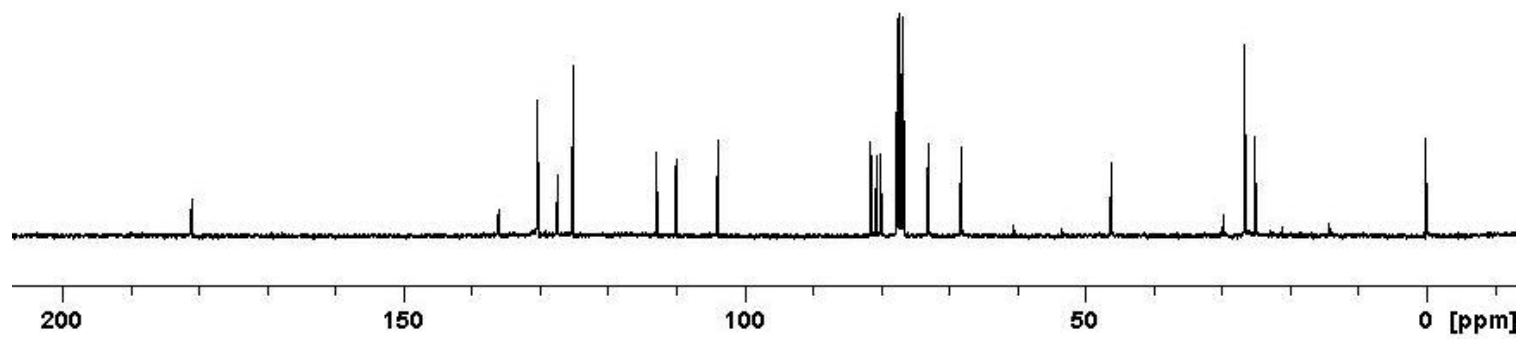

<sup>13</sup>C-NMR (CDCl<sub>3</sub>, 75.5 MHz) of 15a

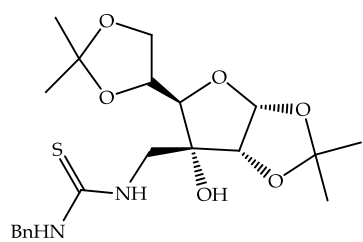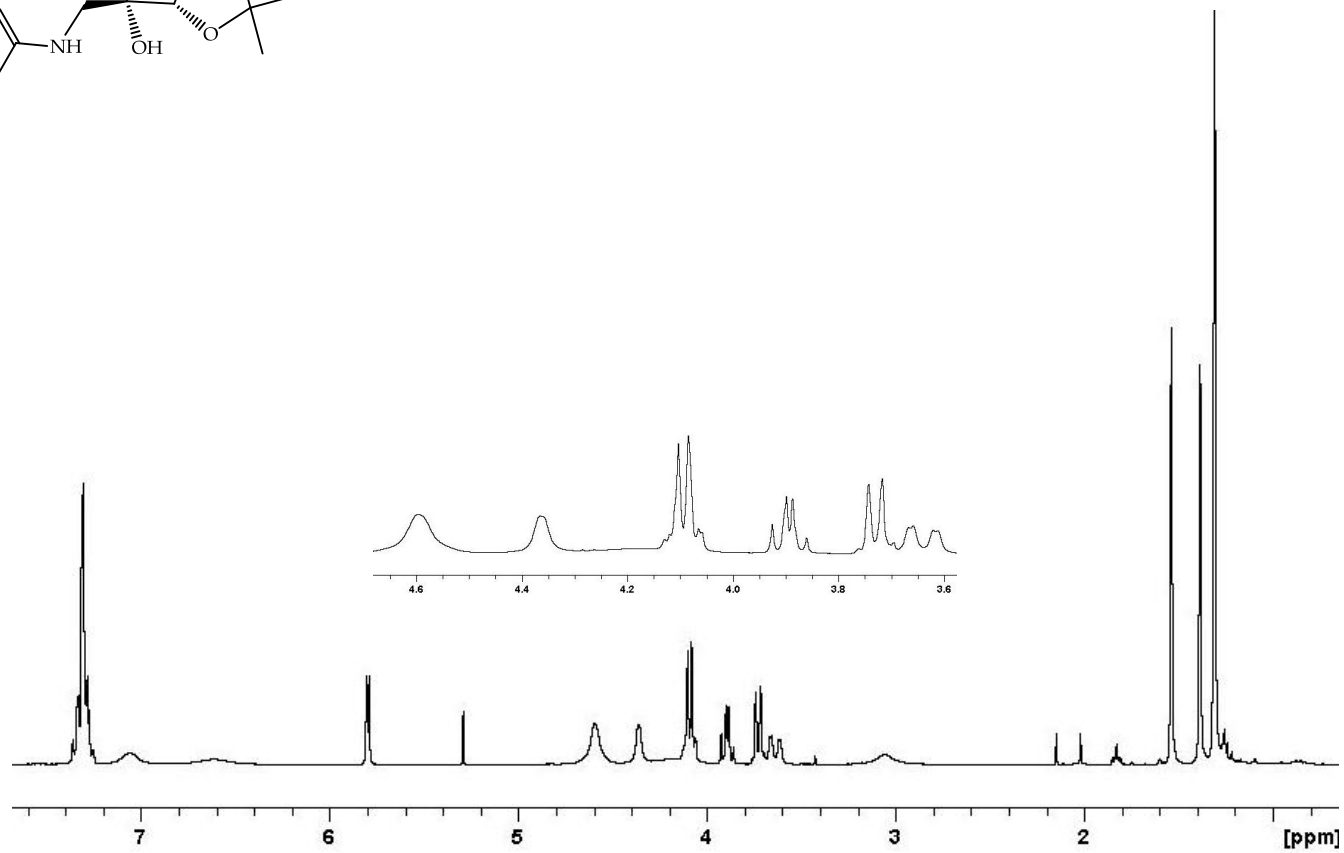

$^1\text{H-NMR}$  ( $\text{CDCl}_3$ , 300 MHz) of **15b**

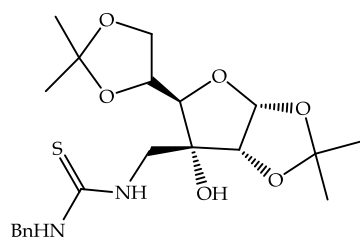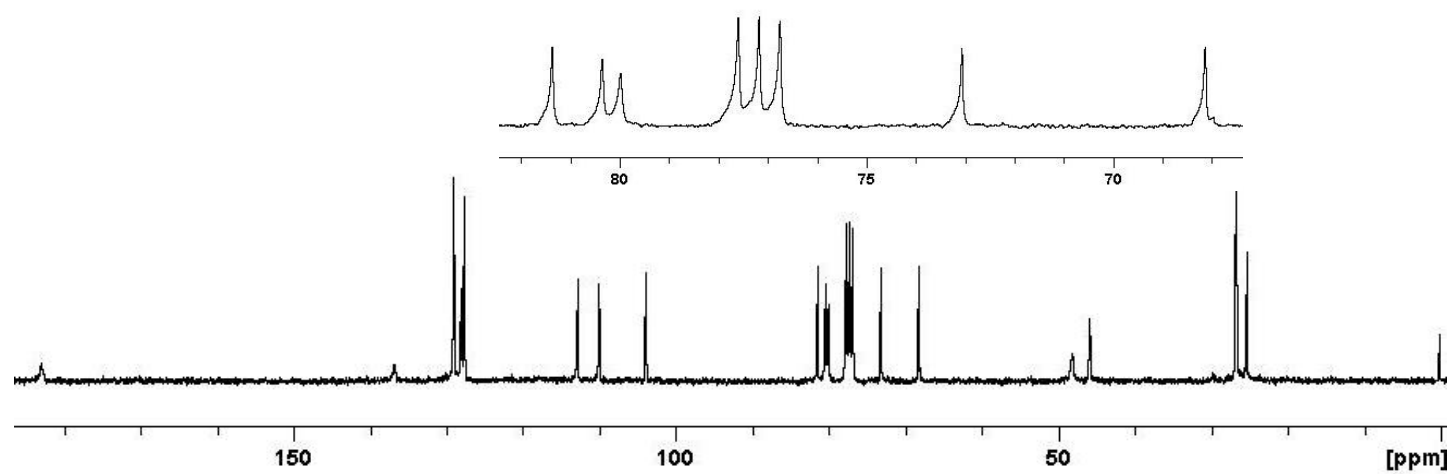

<sup>13</sup>C-NMR (CDCl<sub>3</sub>, 75.5 MHz) of **15b**

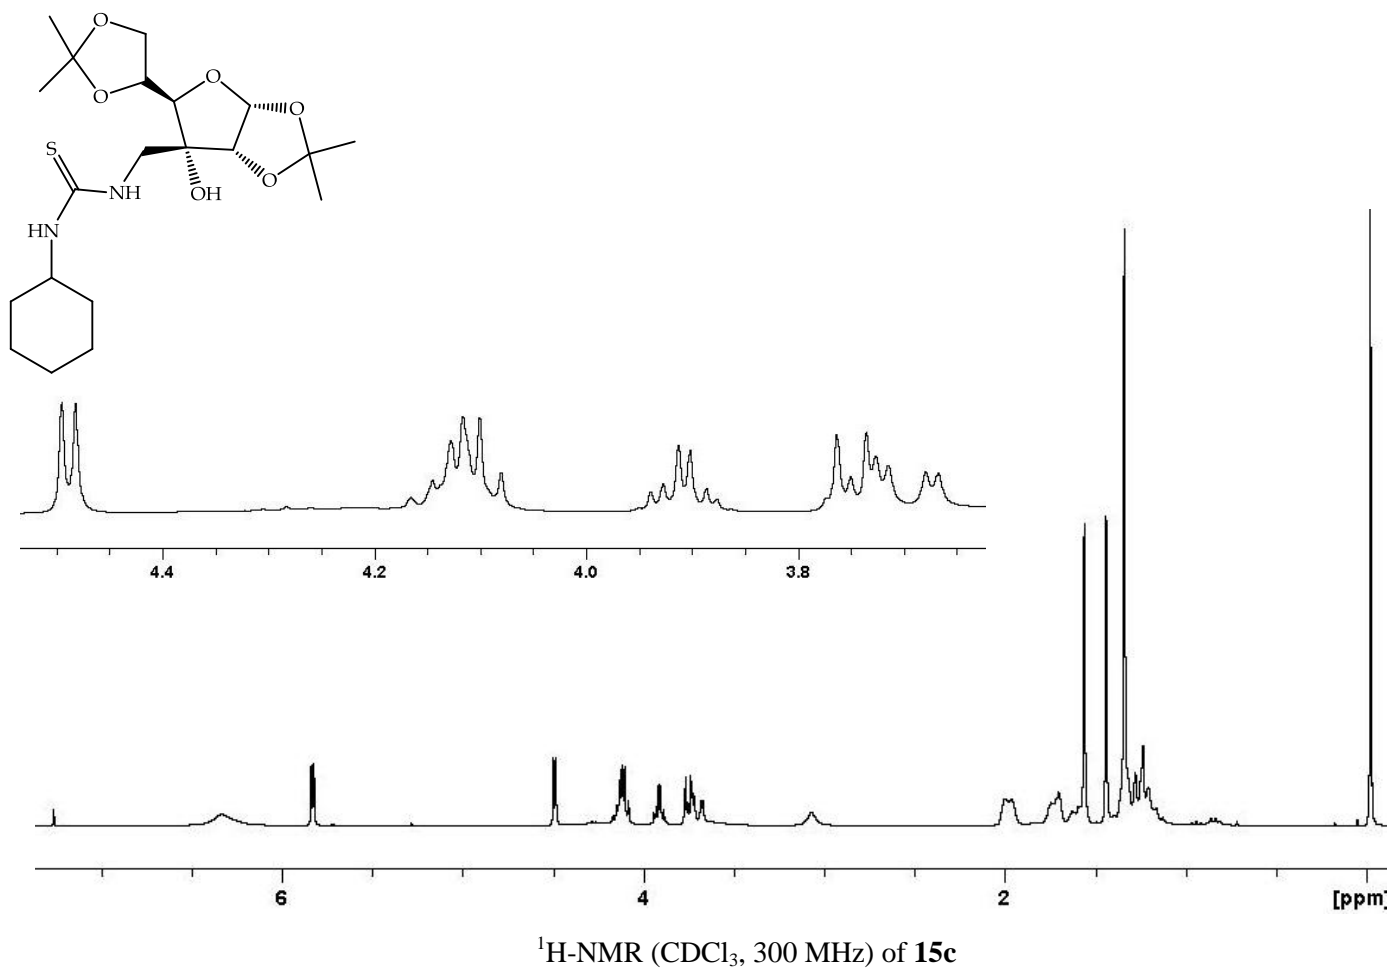

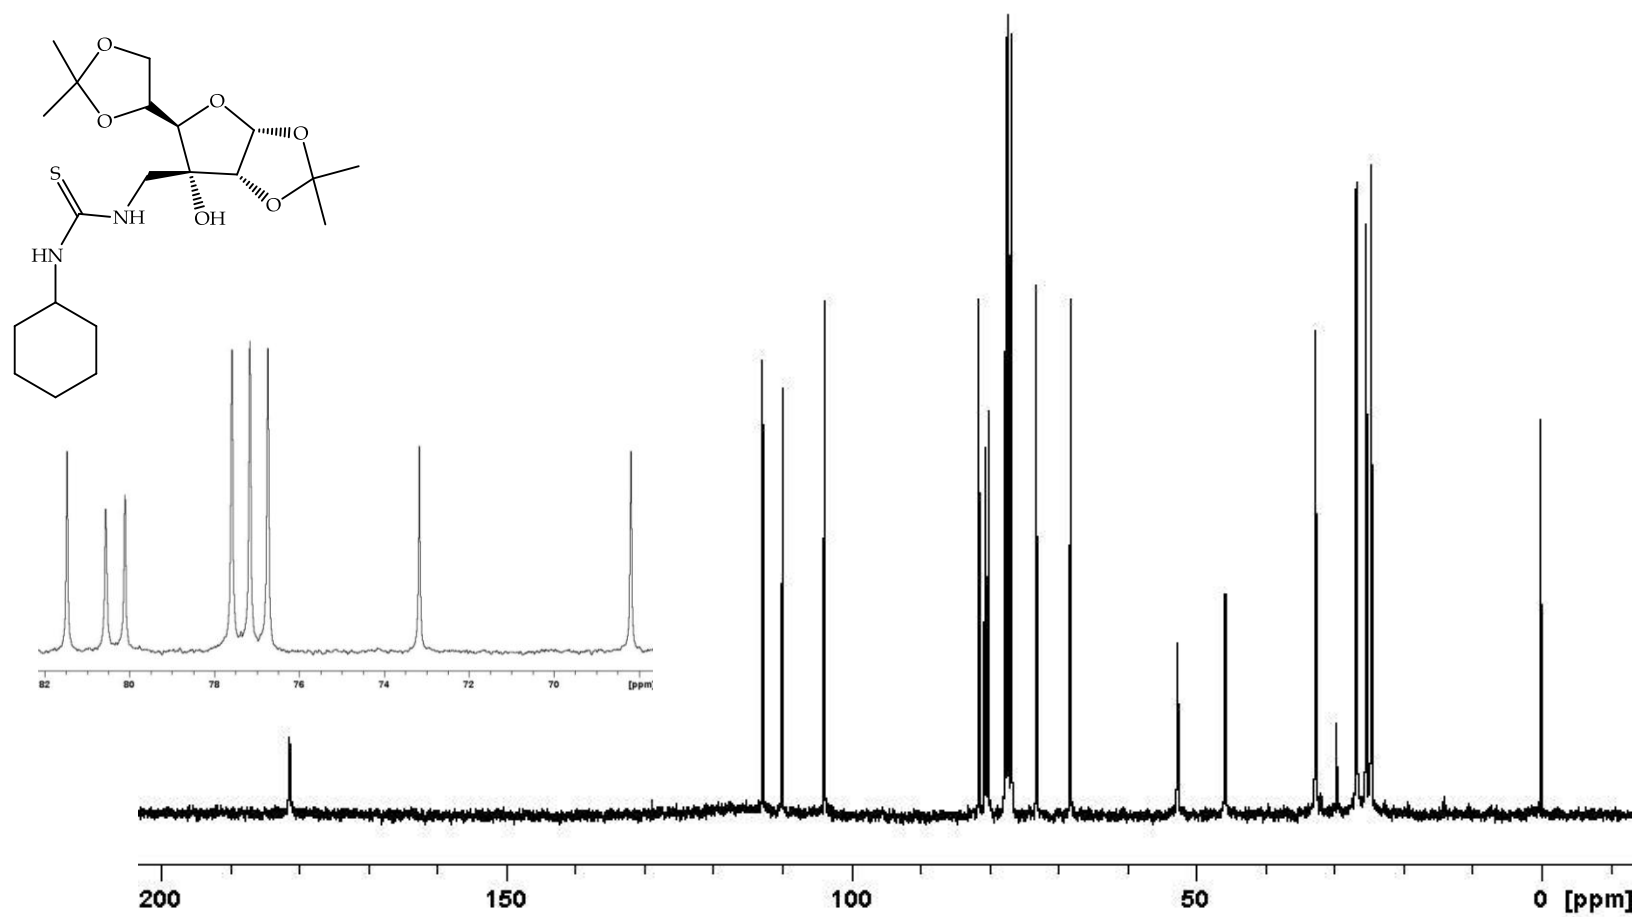

$^{13}\text{C}$ -NMR ( $\text{CDCl}_3$ , 75.5 MHz) of **15c**

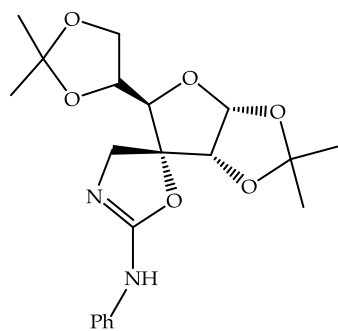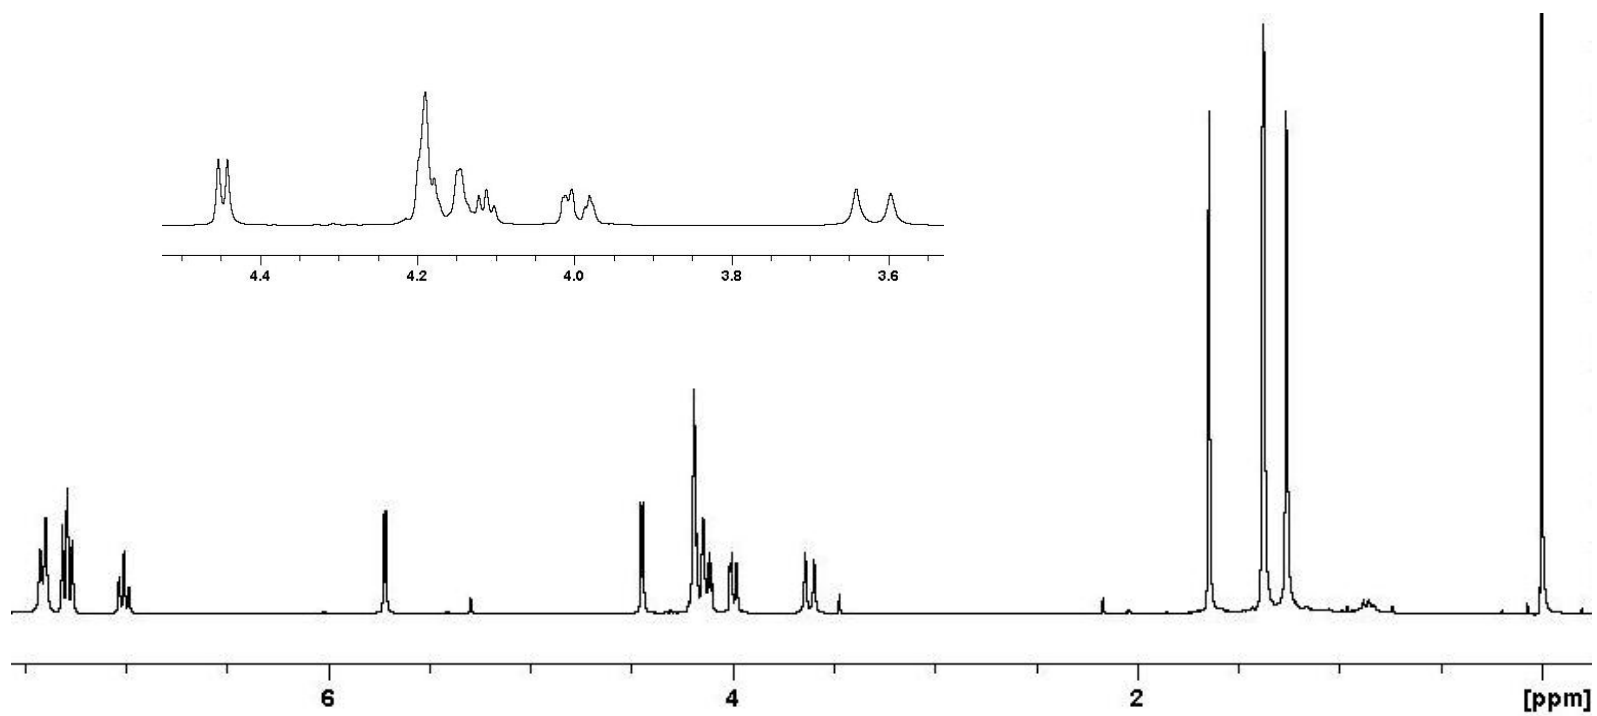

$^1\text{H-NMR}$  ( $\text{CDCl}_3$ , 300 MHz) of **8a**

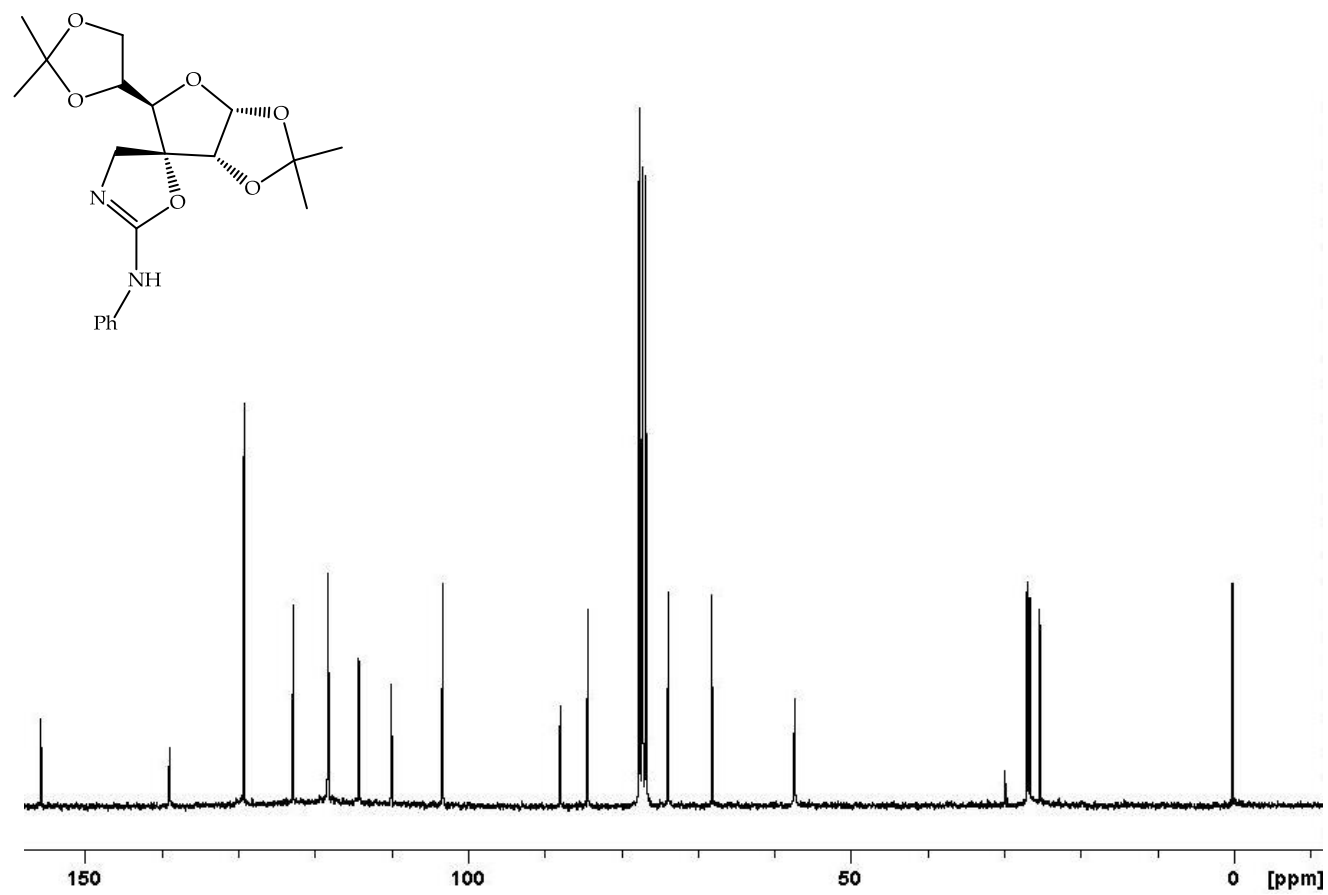

$^{13}\text{C}$ -NMR ( $\text{CDCl}_3$ , 75.5 MHz) of **8a**



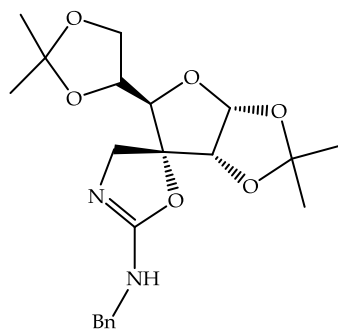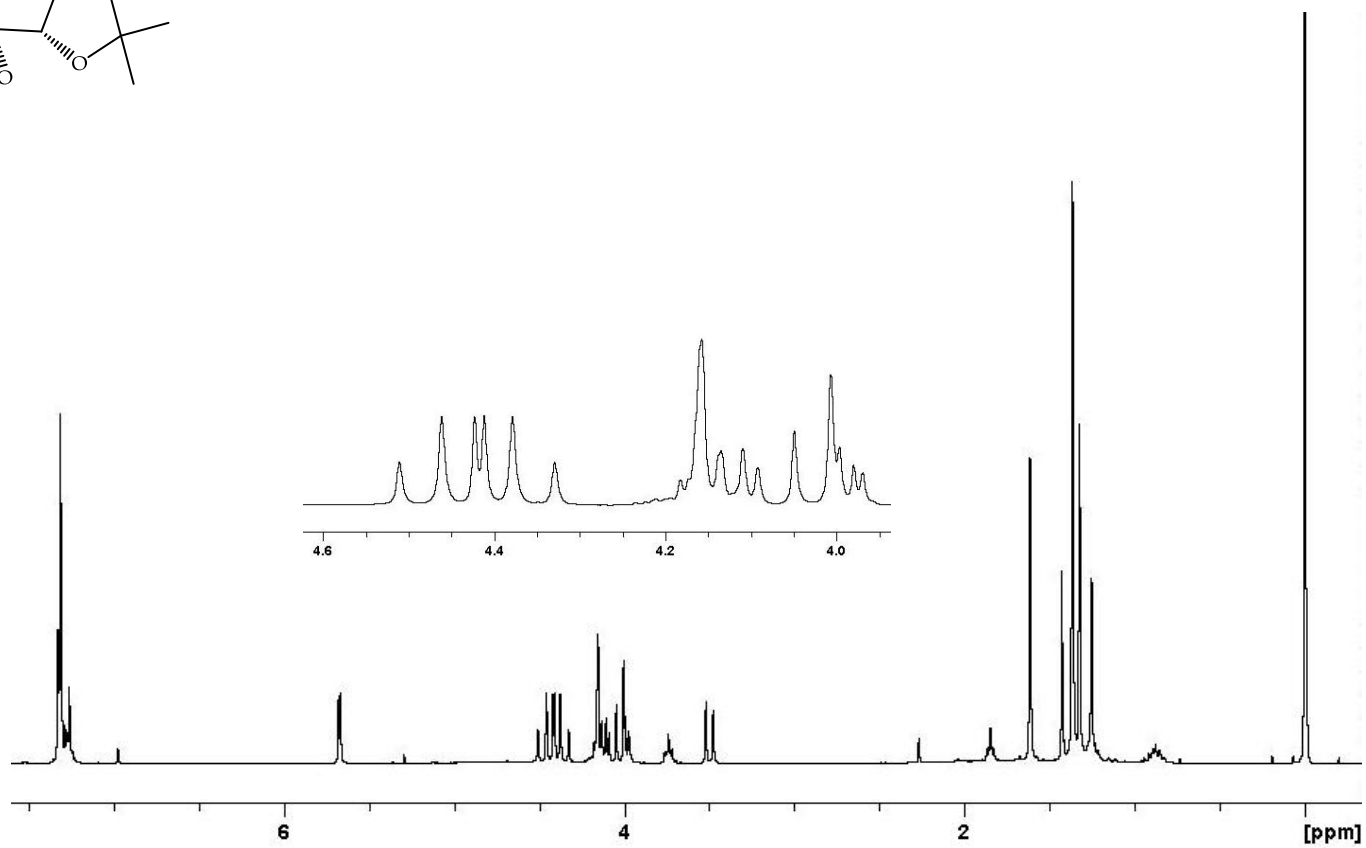

$^1\text{H-NMR}$  ( $\text{CDCl}_3$ , 300 MHz) of **8b**

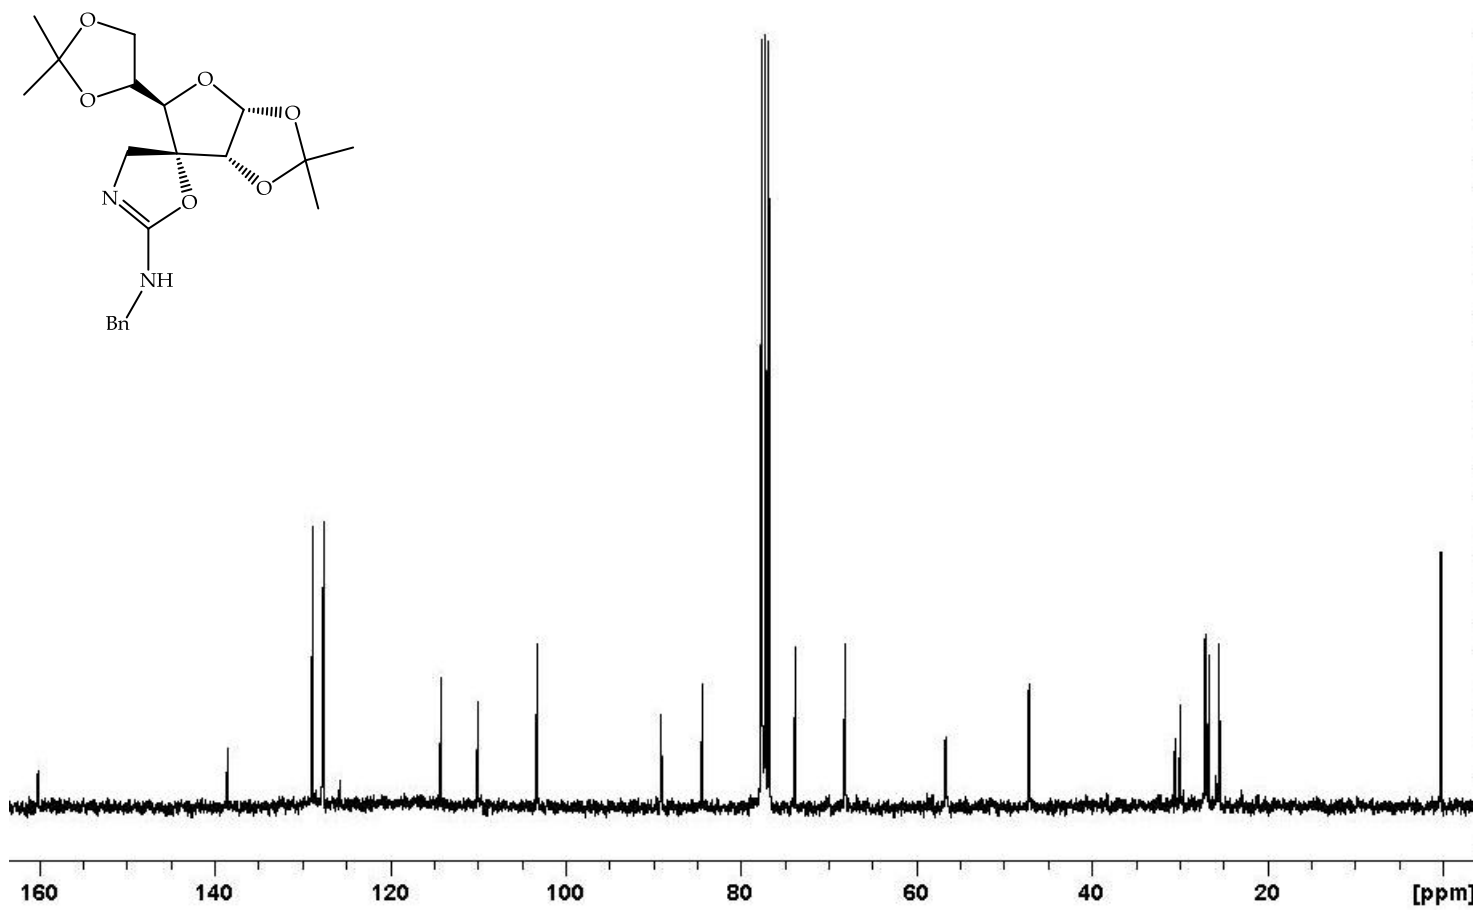

<sup>13</sup>C-NMR (CDCl<sub>3</sub>, 75.5 MHz) of **8b**

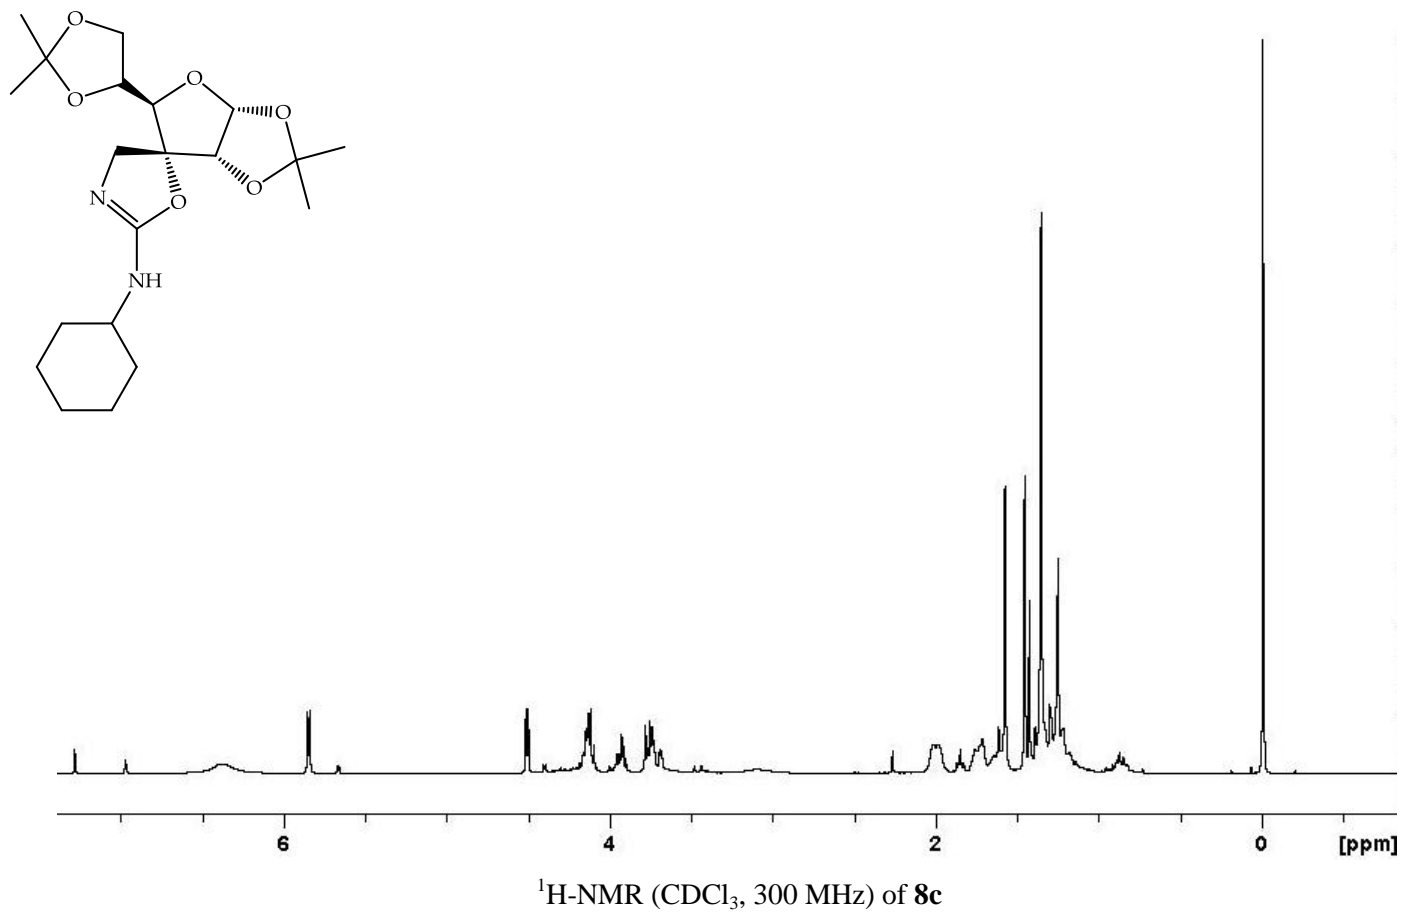

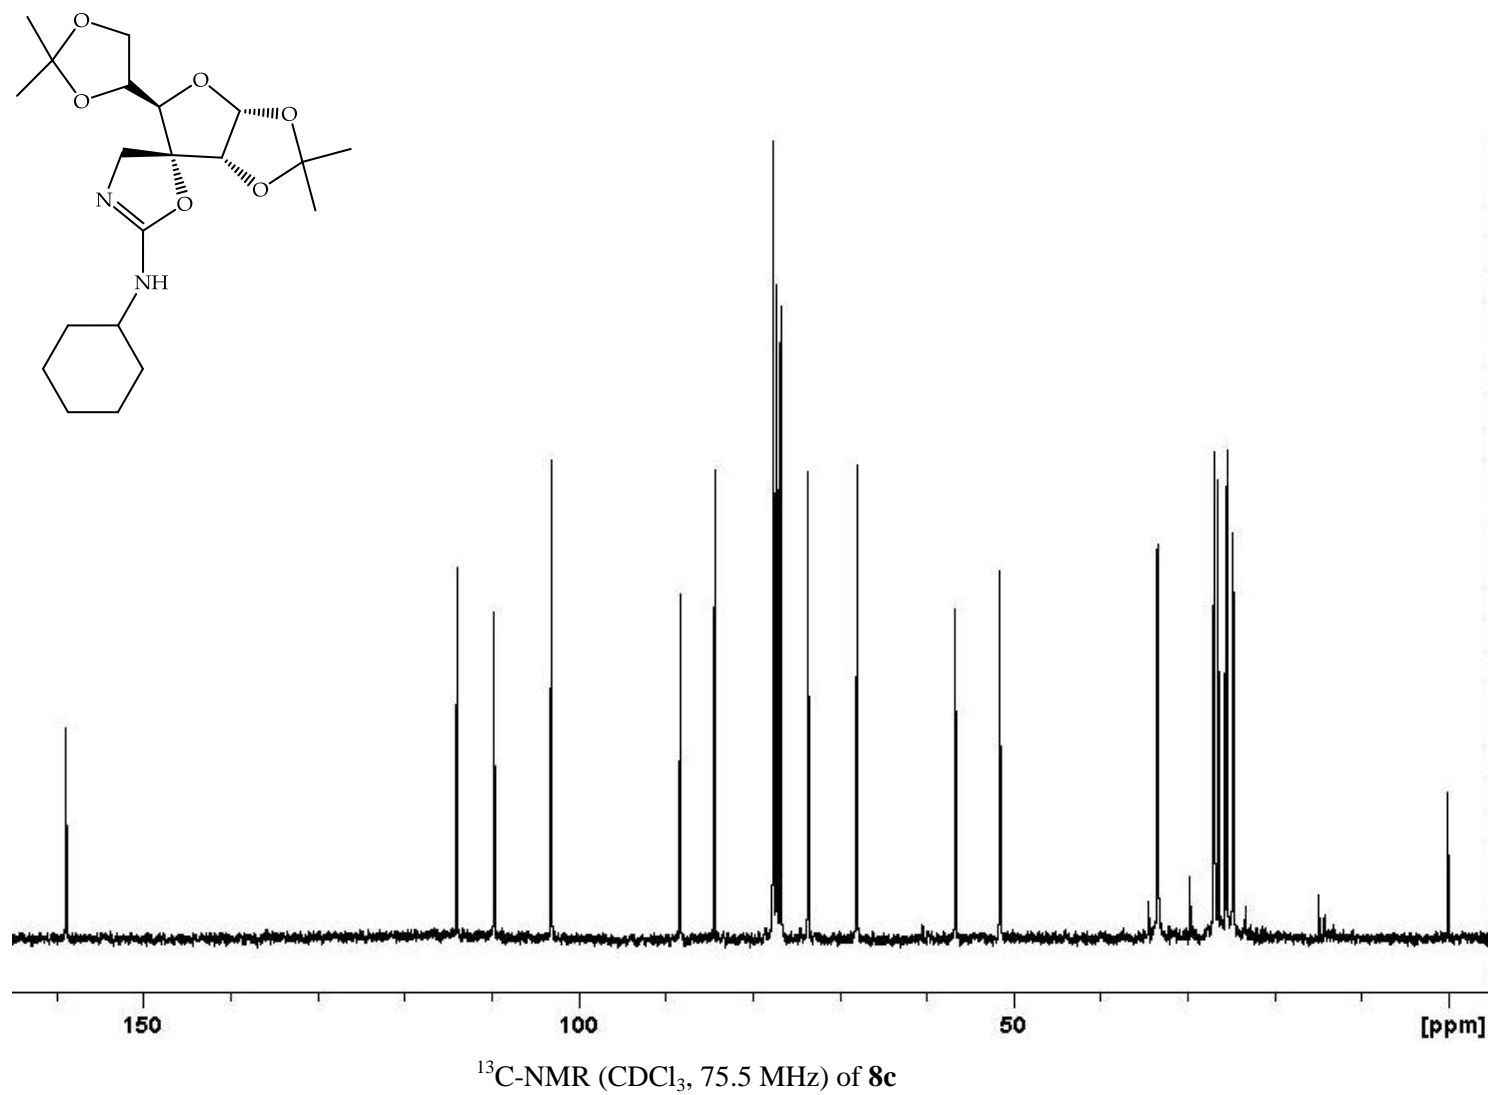

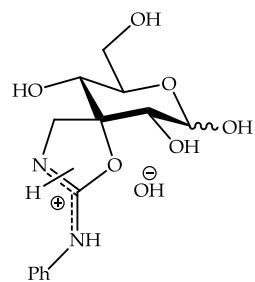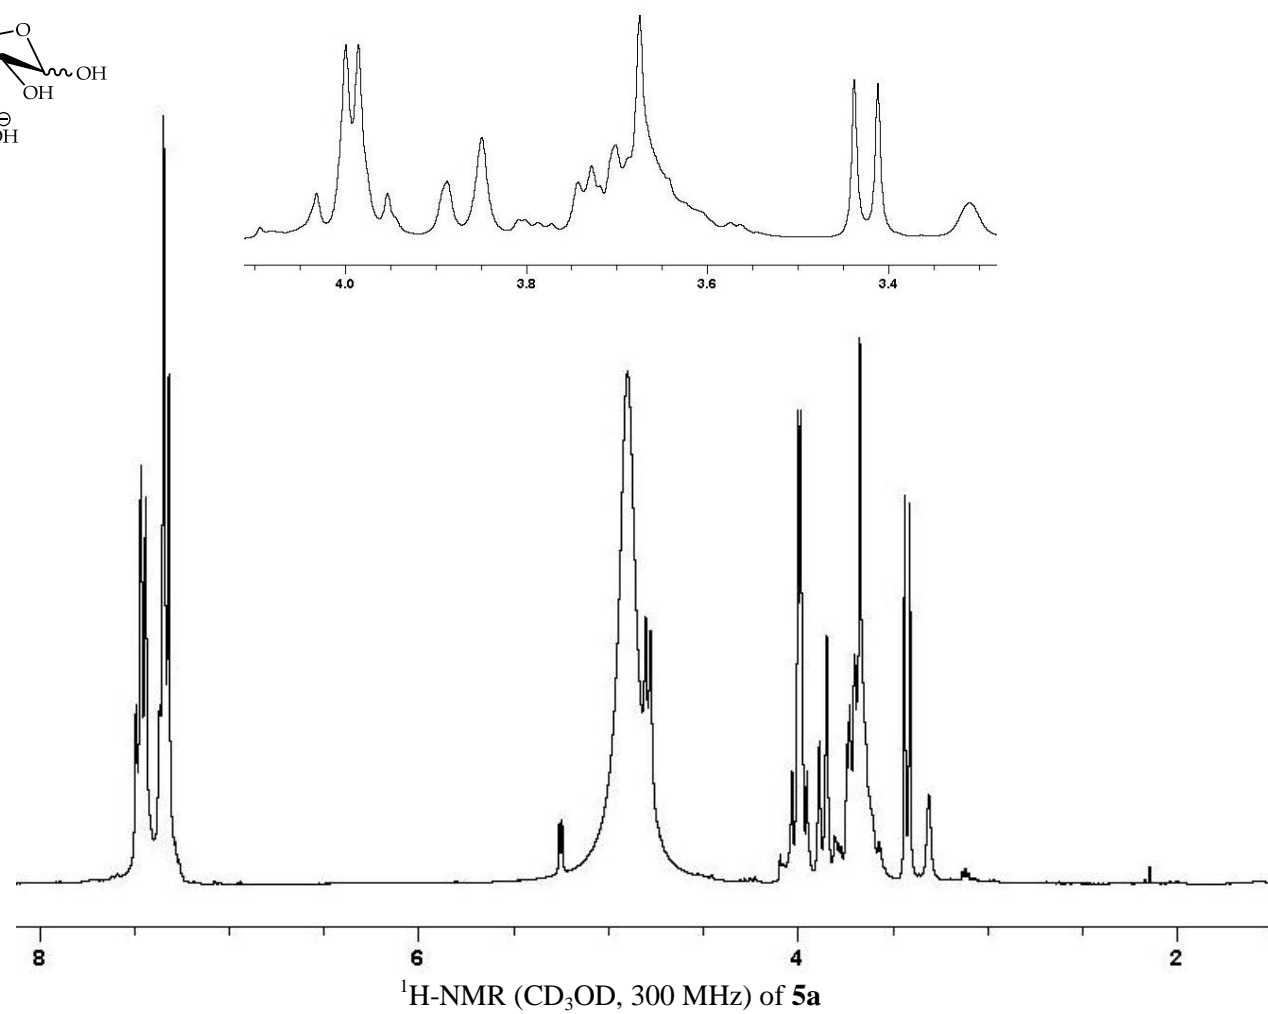

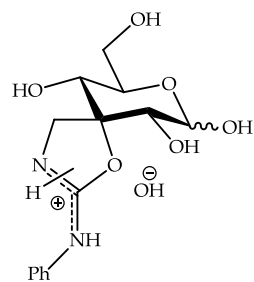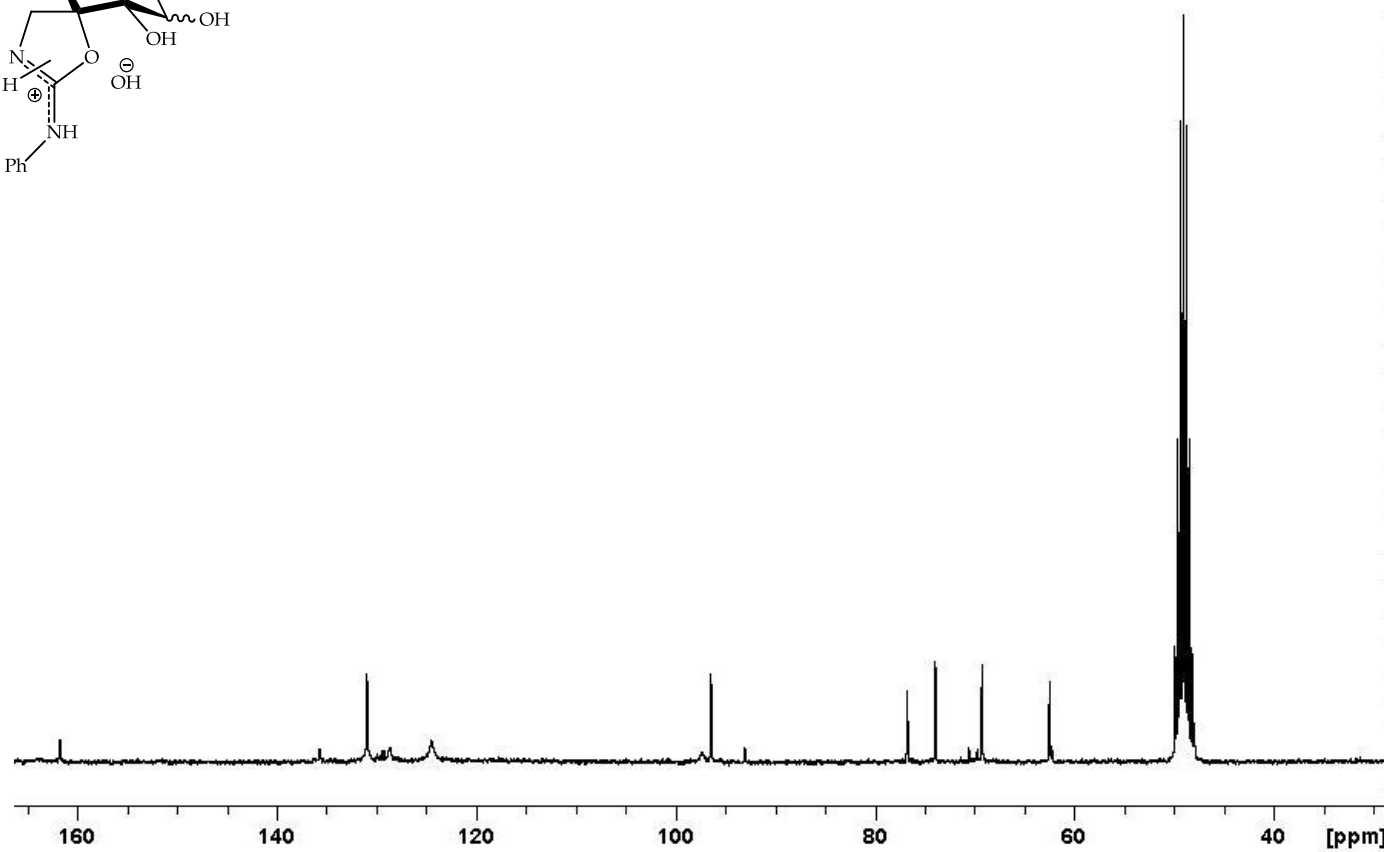

<sup>13</sup>C-NMR (CD<sub>3</sub>OD, 75.5 MHz) of **5a**

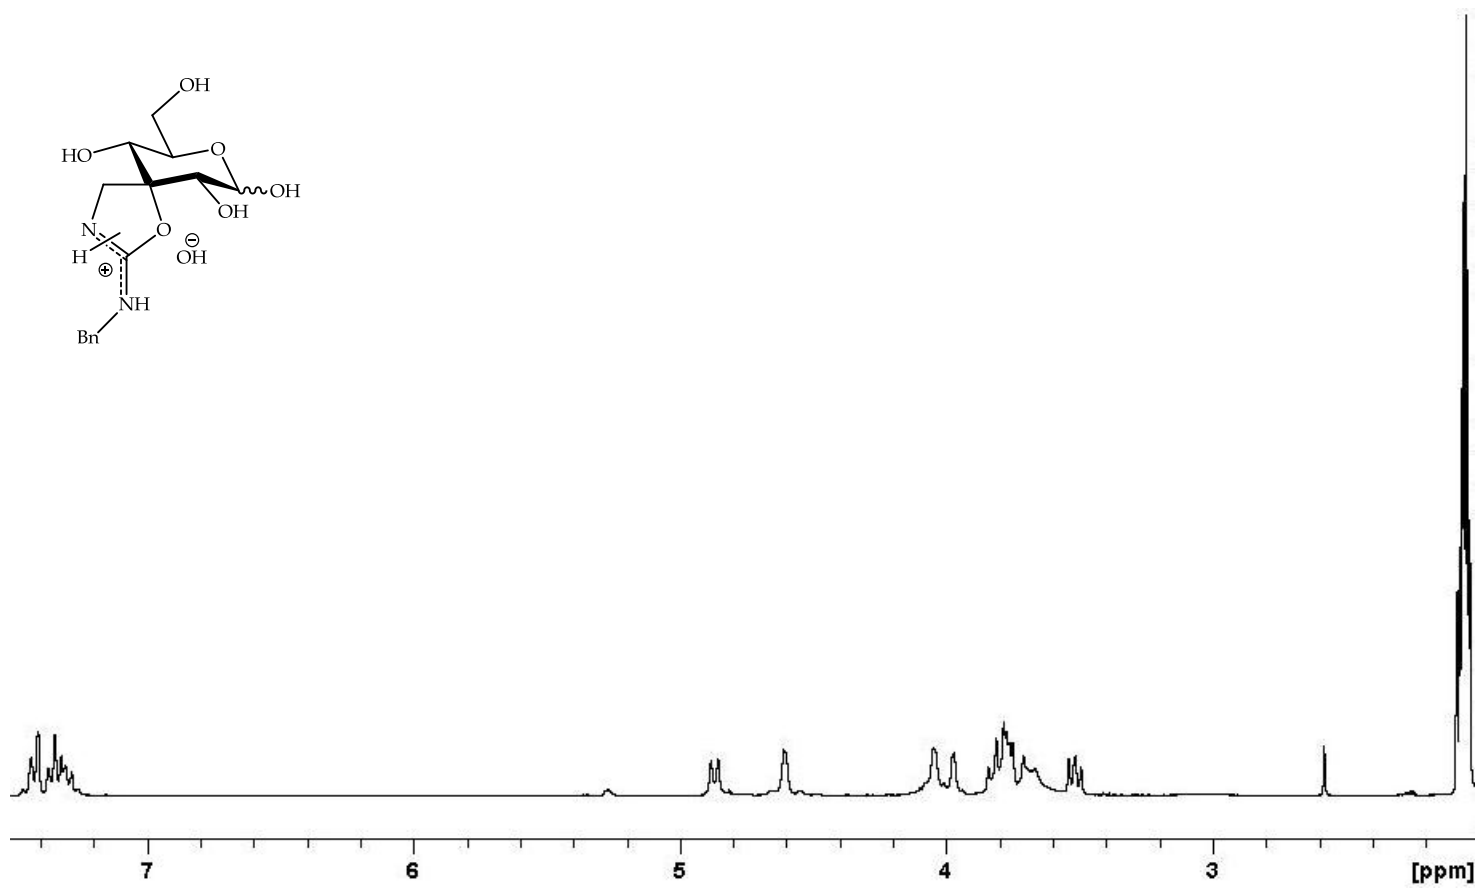

<sup>1</sup>H-NMR ((CD<sub>3</sub>)<sub>2</sub>CO, 300 MHz) of **5b**

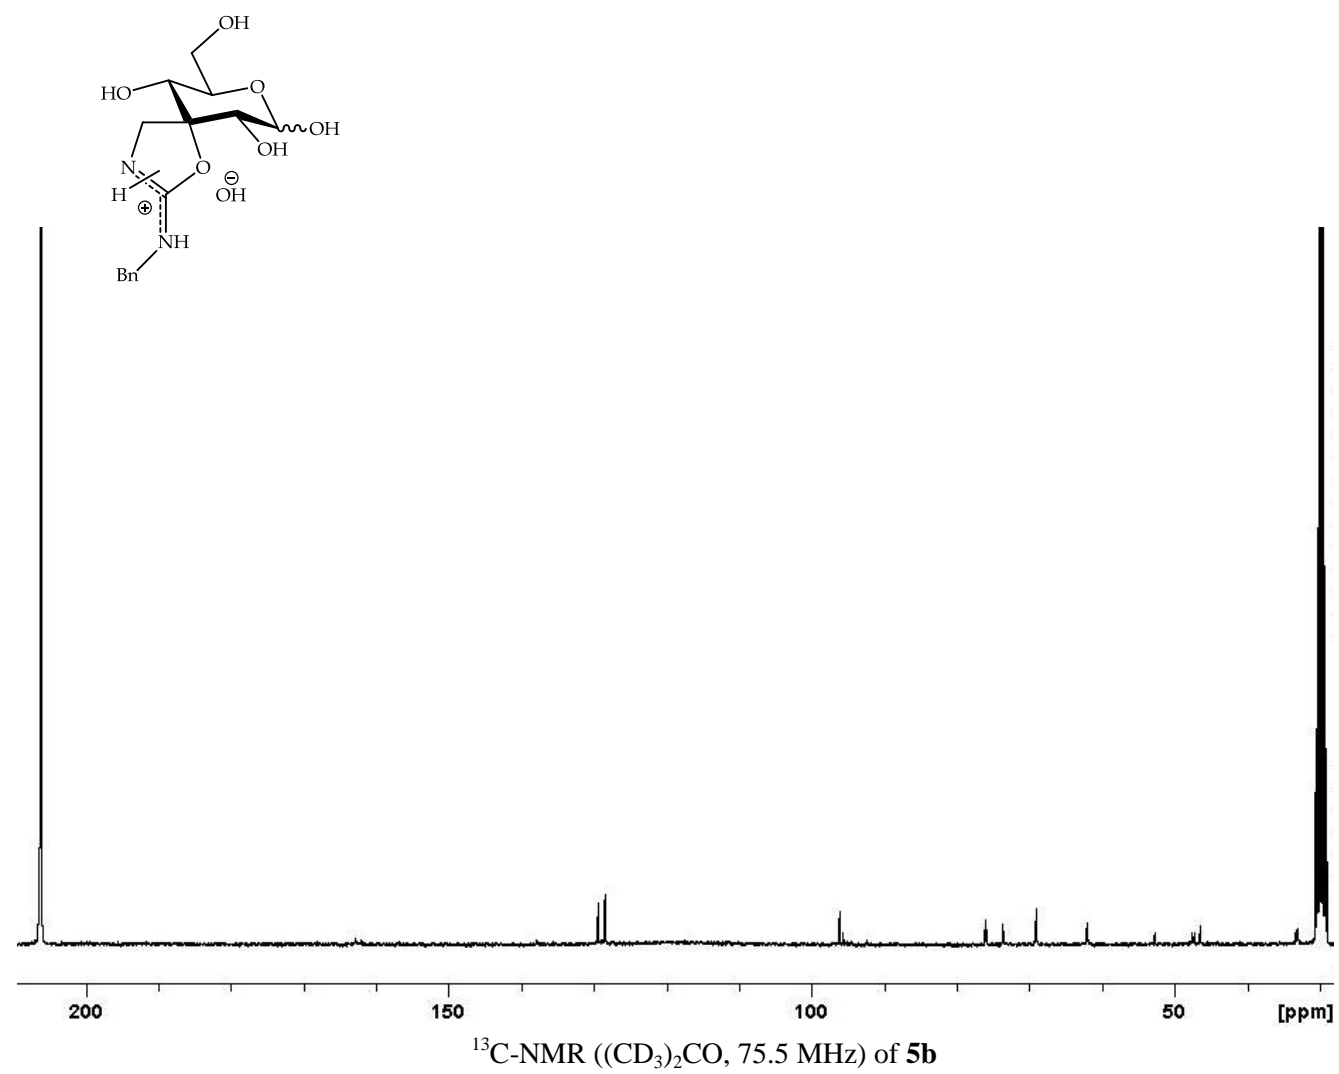



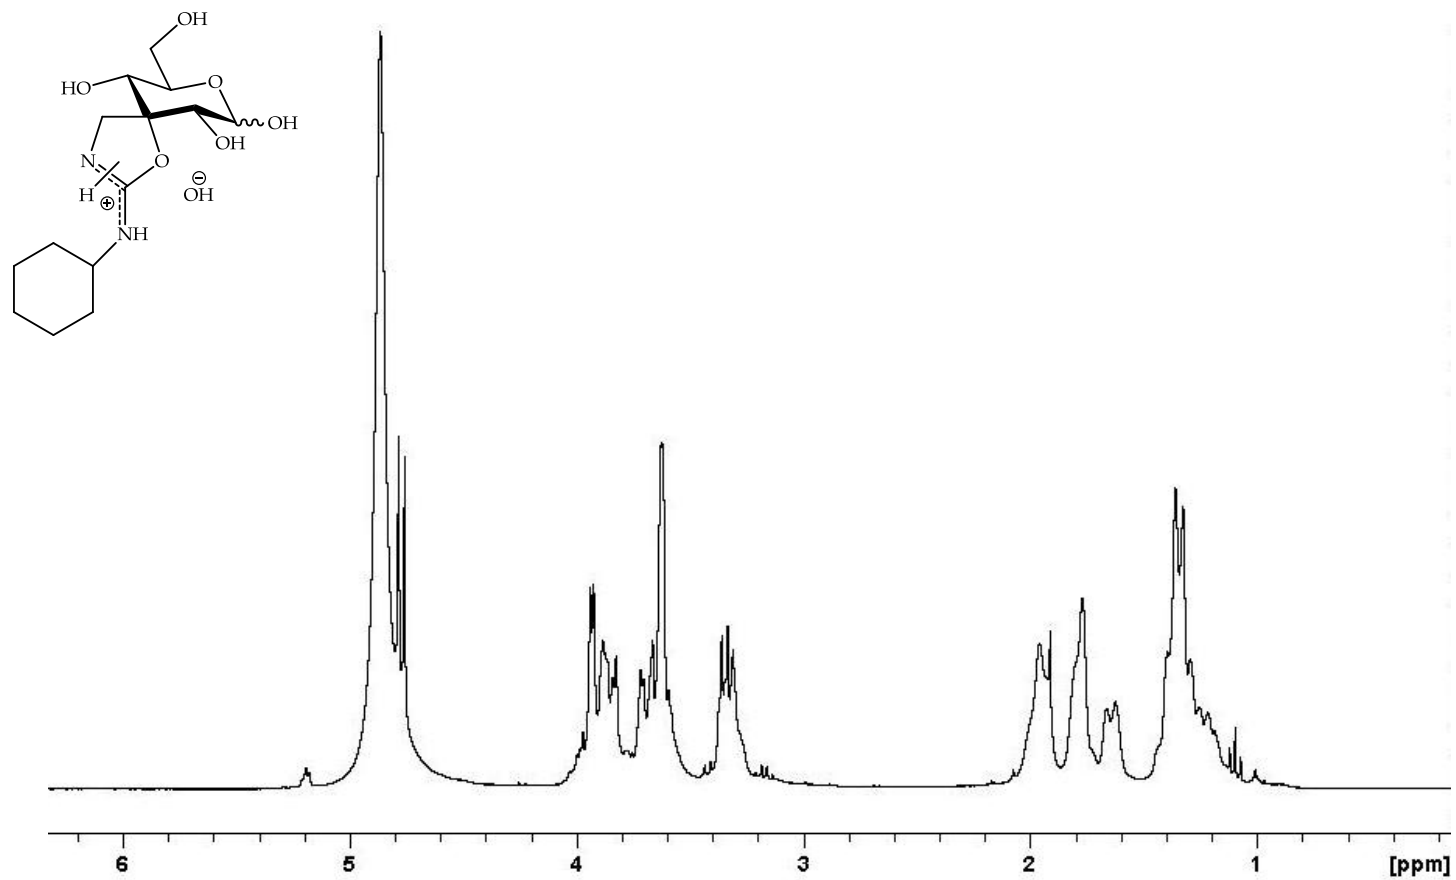

<sup>1</sup>H-NMR (CD<sub>3</sub>OD, 300 MHz) of **5c**

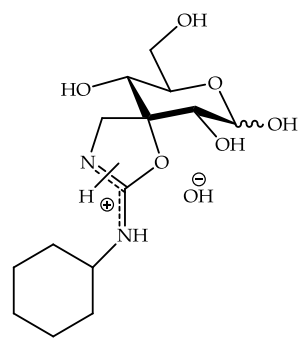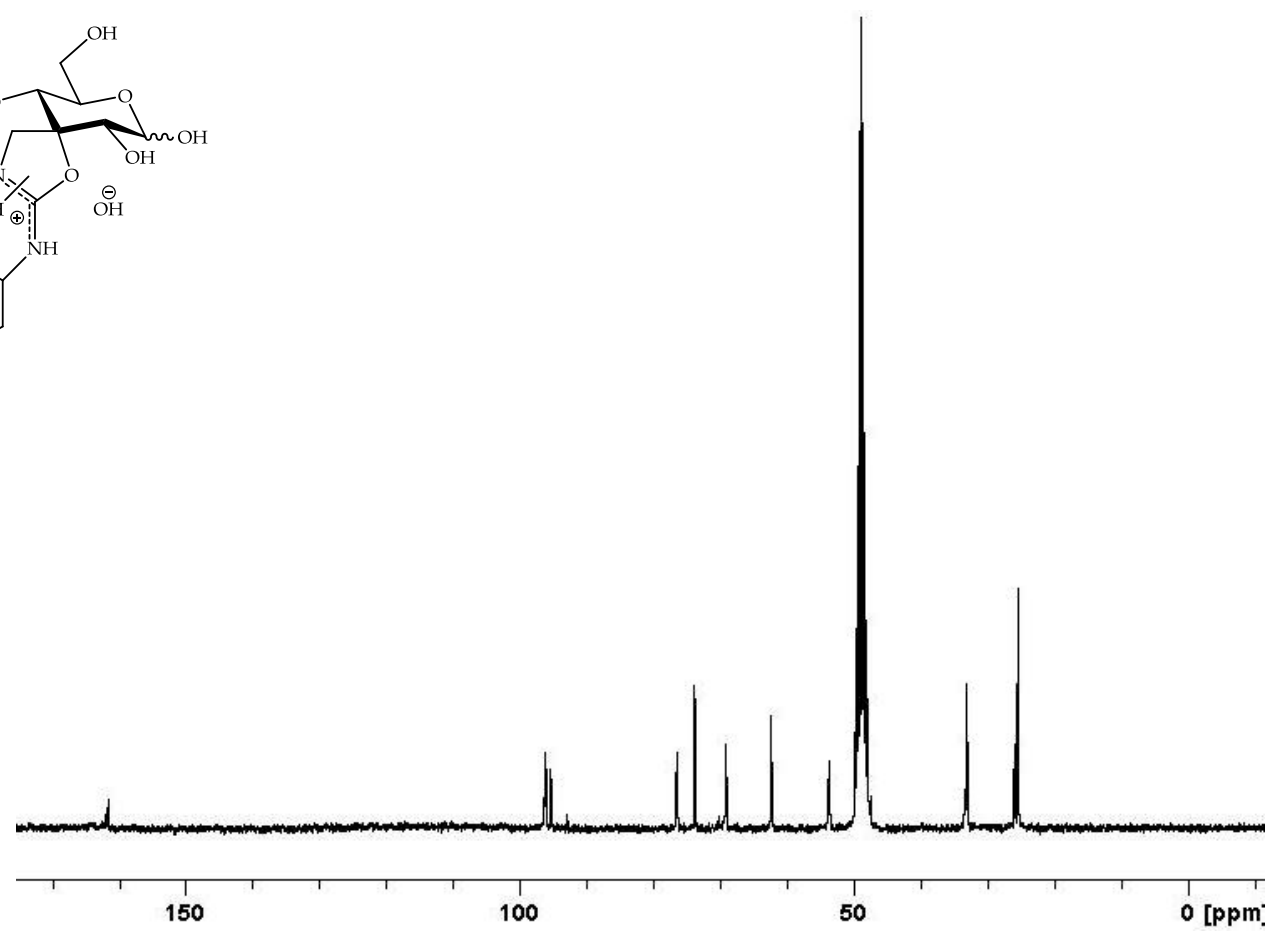

<sup>13</sup>C-NMR (CD<sub>3</sub>OD, 75.5 MHz) of **5c**

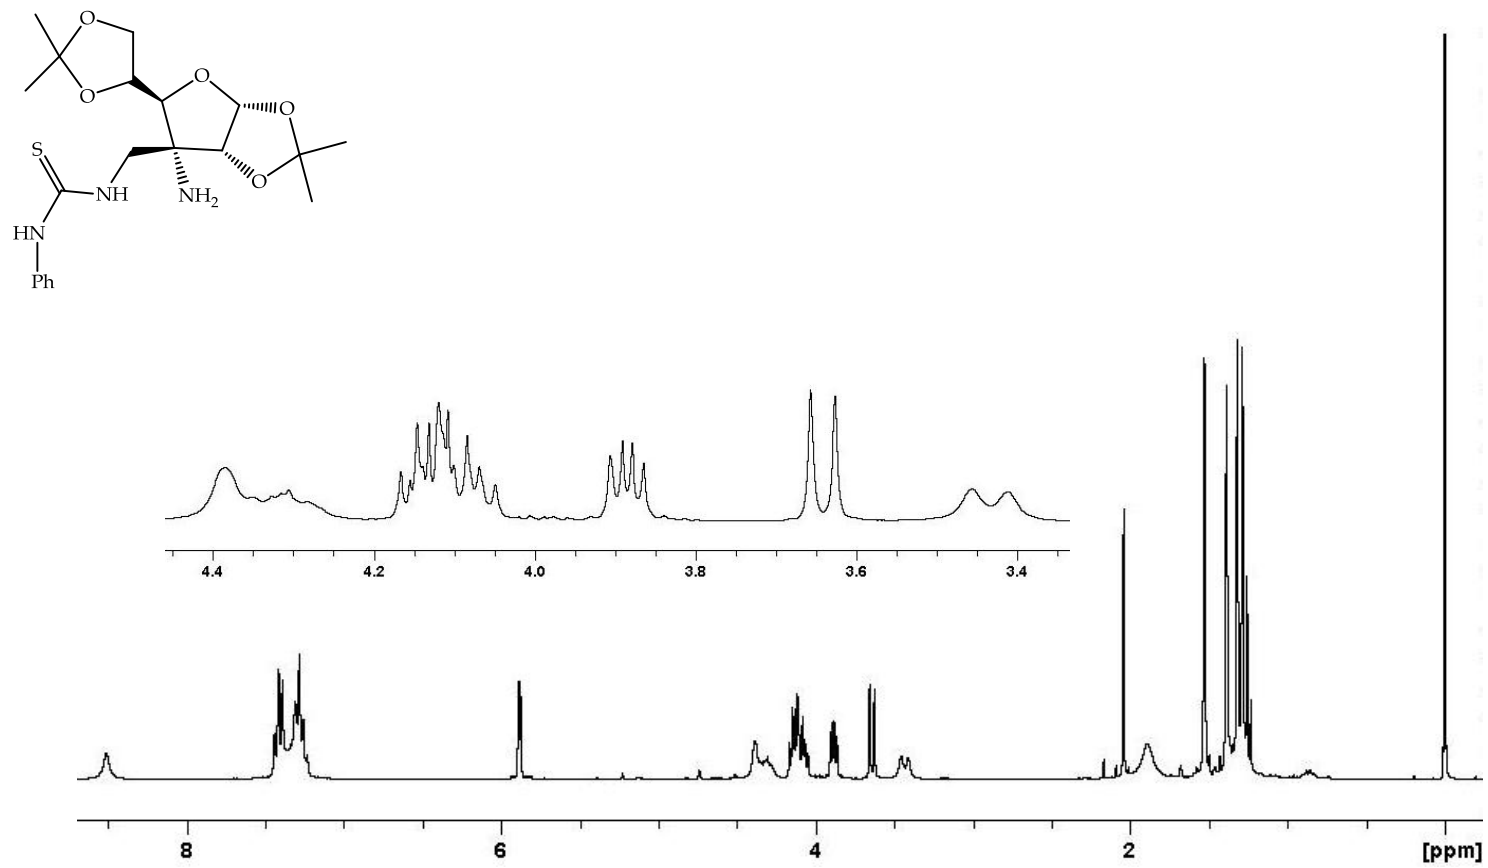

$^1\text{H-NMR}$  ( $\text{CDCl}_3$ , 300 MHz) of **22a**

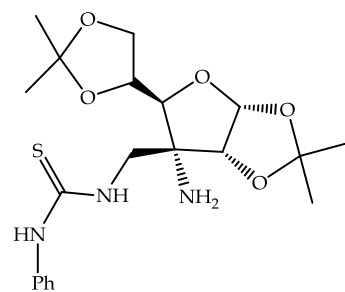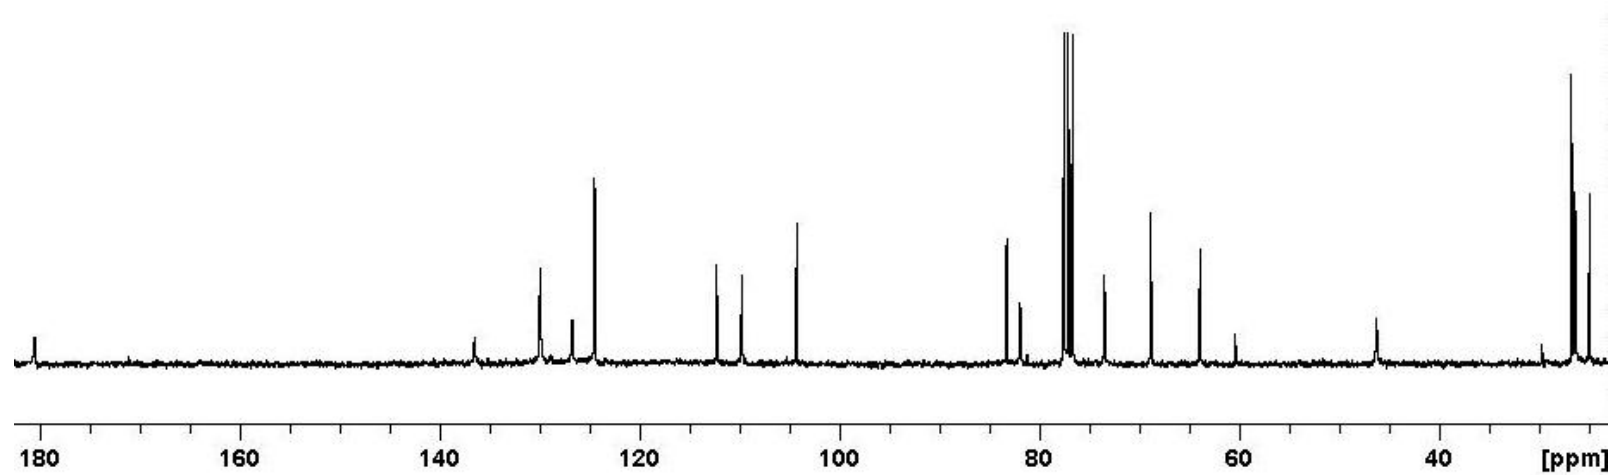

<sup>13</sup>C-NMR (CDCl<sub>3</sub>, 75.5 MHz) of 22a

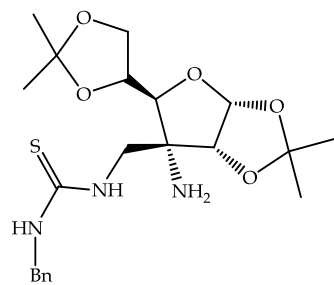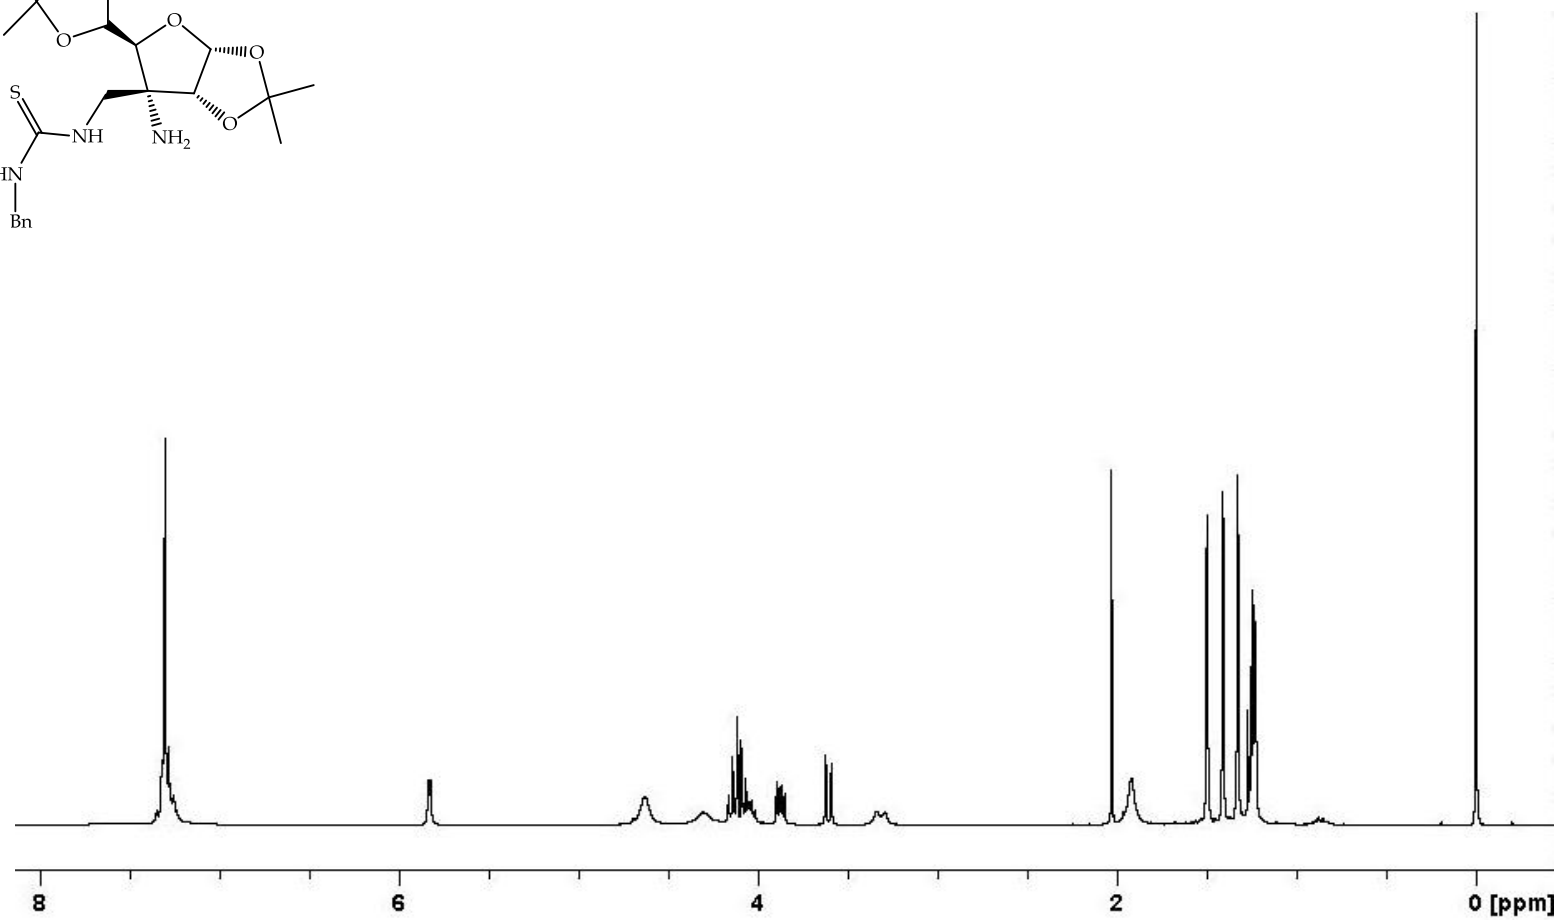

<sup>1</sup>H-NMR (CDCl<sub>3</sub>, 300 MHz) of **22b**

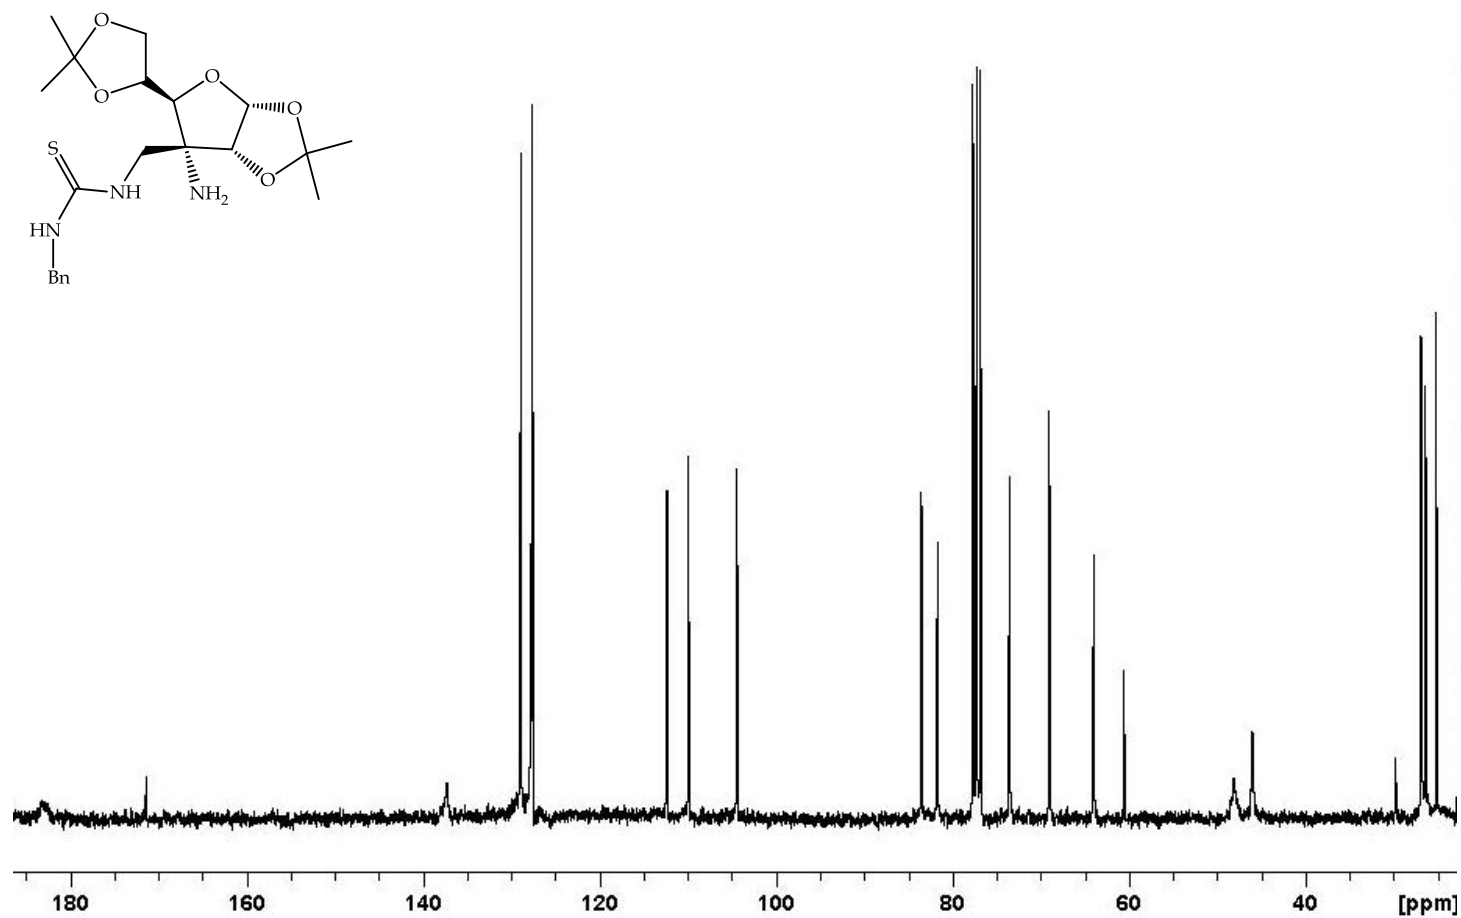

$^{13}\text{C}$ -NMR (CDCl<sub>3</sub>, 75.5 MHz) of **22b**

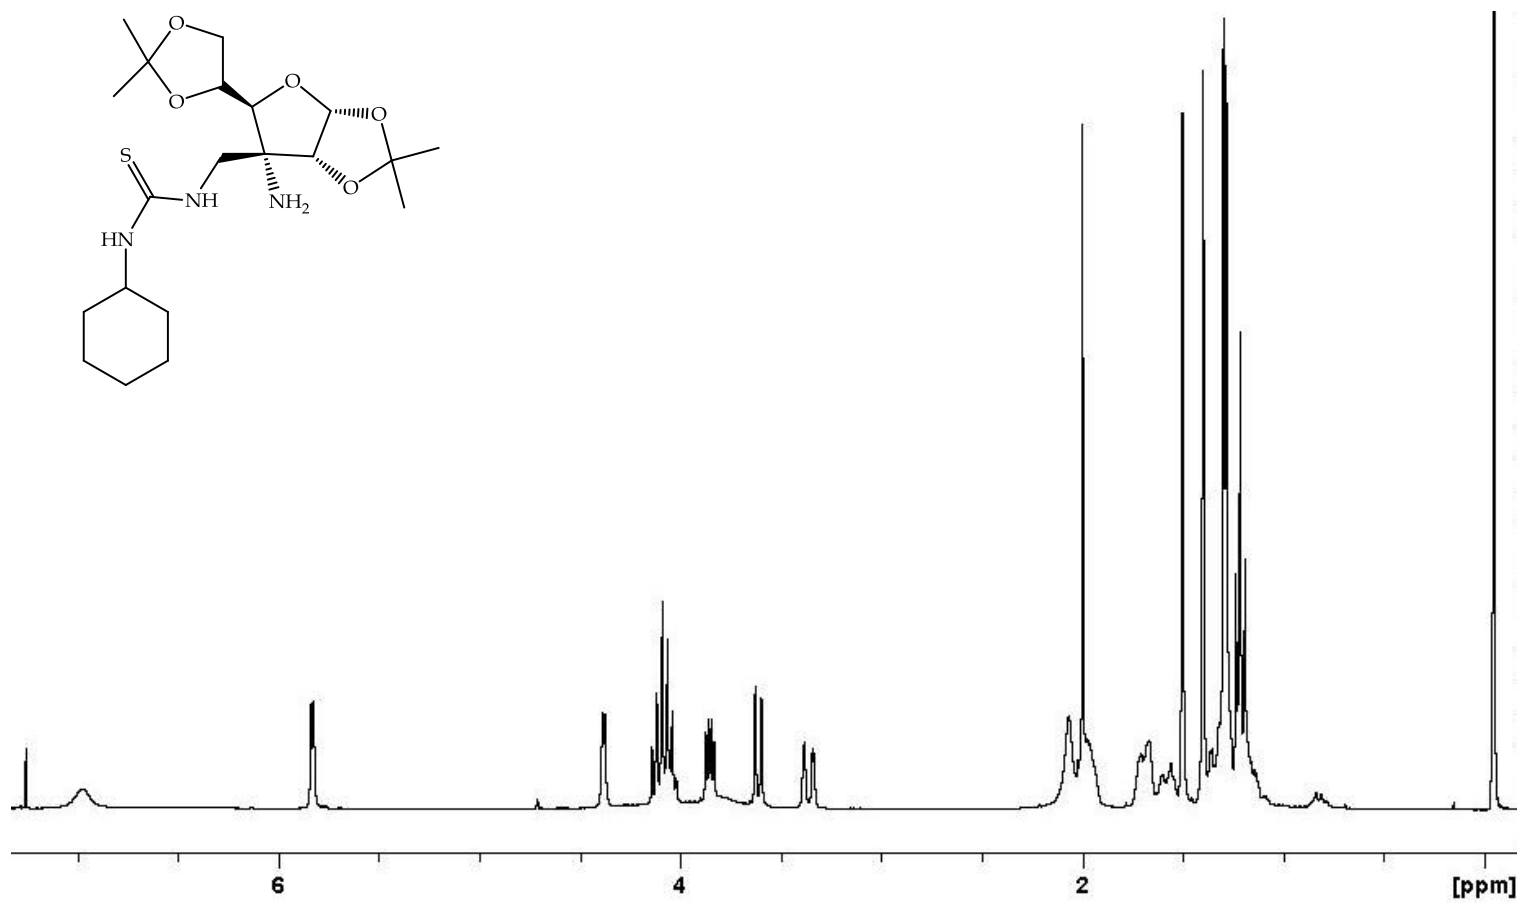

<sup>1</sup>H-NMR (CDCl<sub>3</sub>, 300 MHz) of **22c**

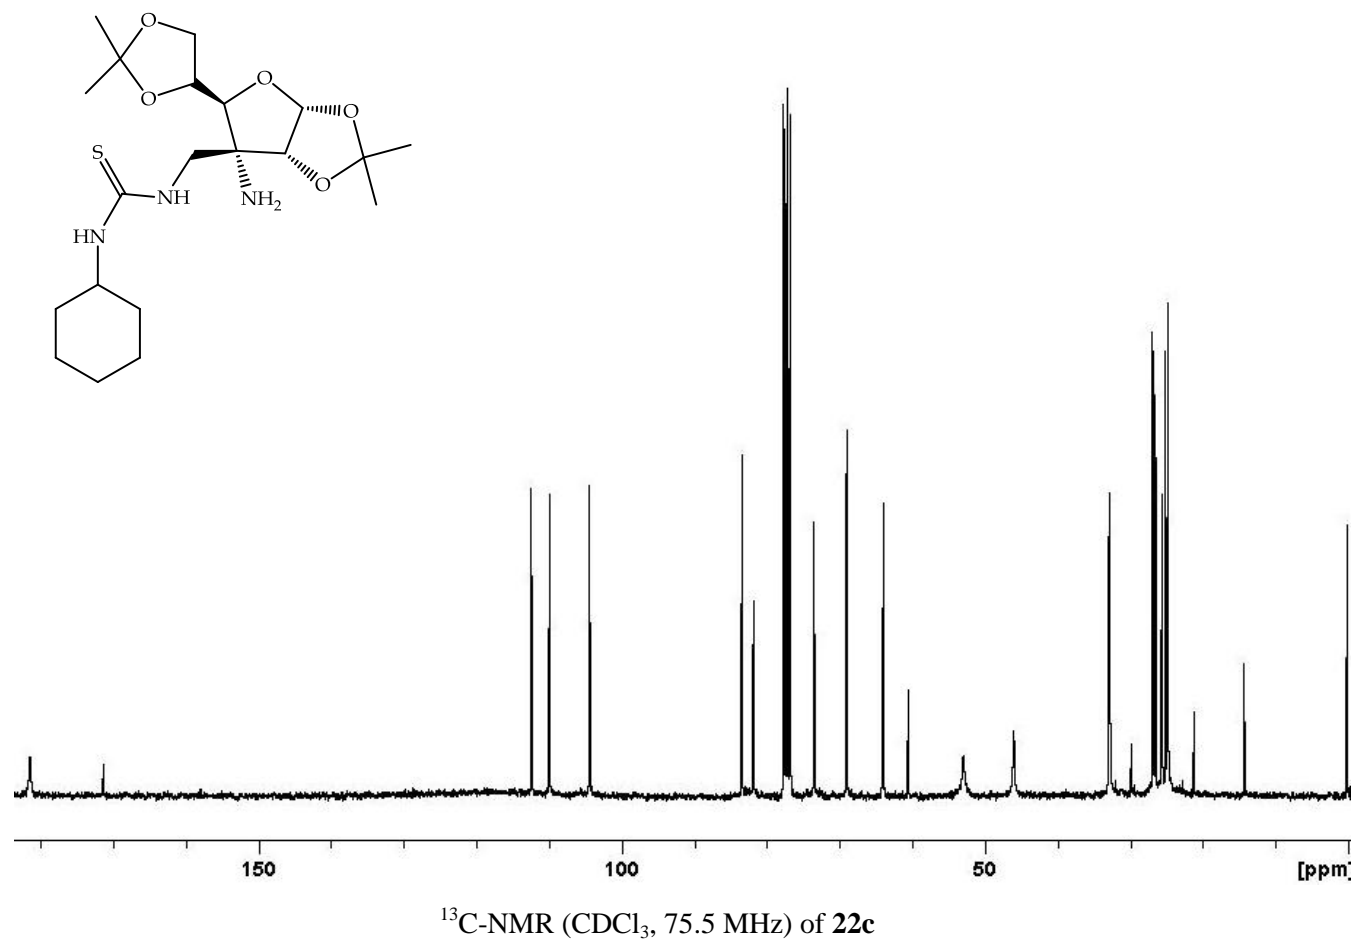



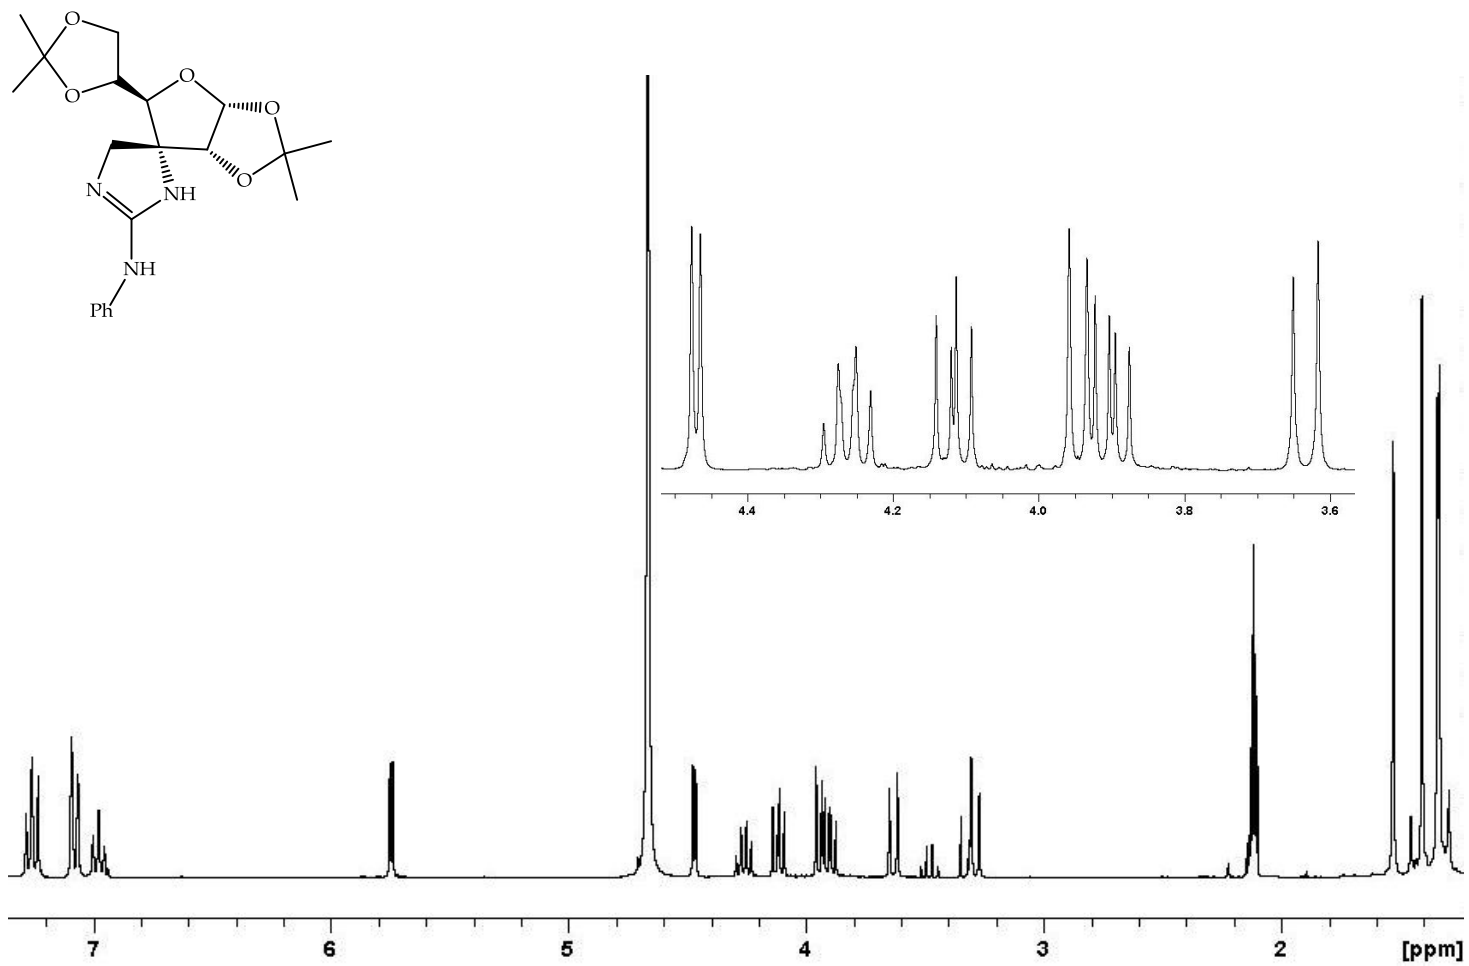

$^1\text{H-NMR}$  ( $\text{CD}_3\text{OD}/\text{DMSO-}d^6$ , 300 MHz) of **9a**

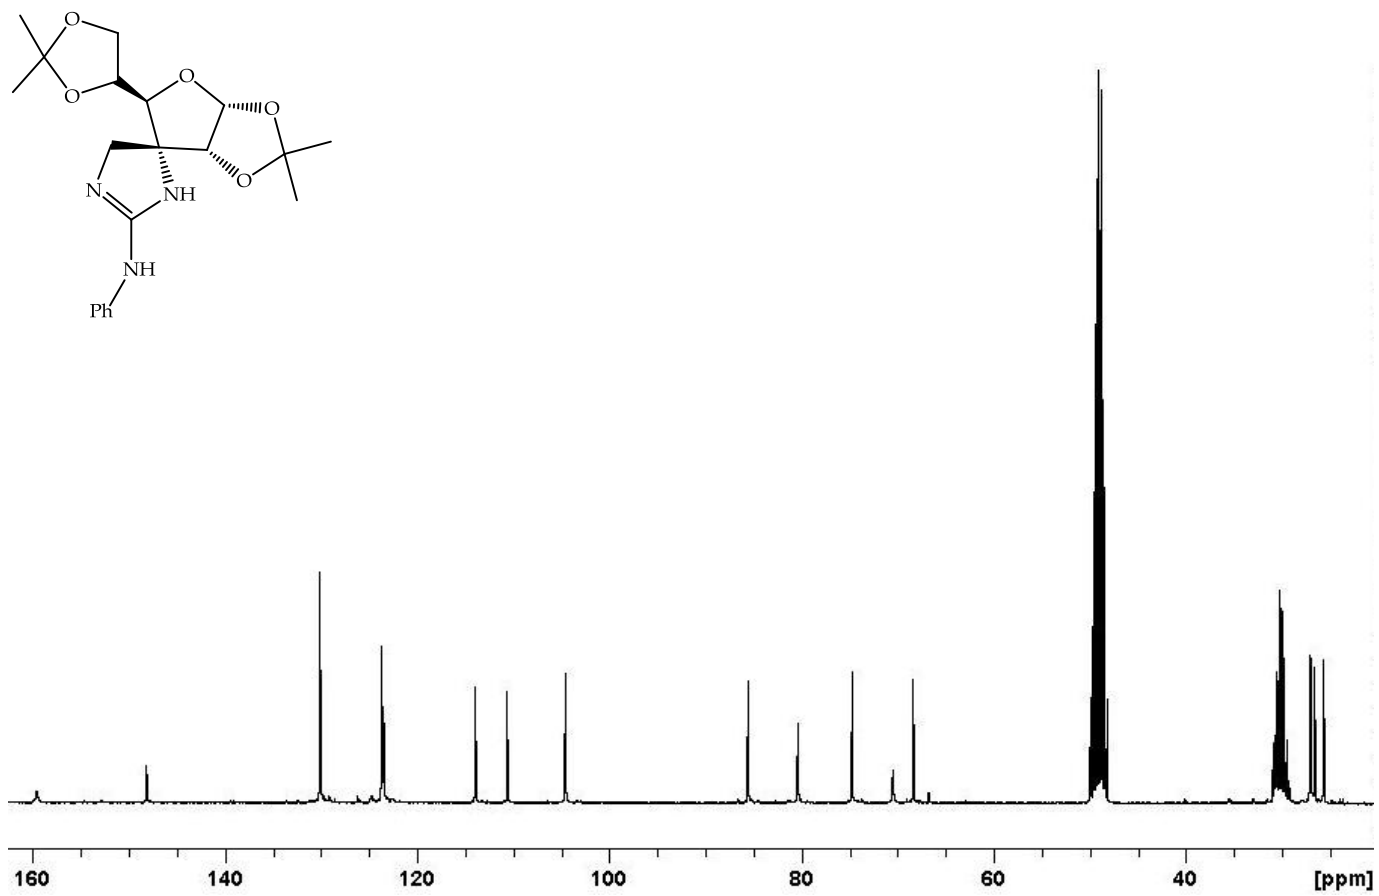

$^{13}\text{C}$ -NMR ( $\text{CD}_3\text{OD}/\text{DMSO}-d^6$ , 75.5 MHz) of **9a**

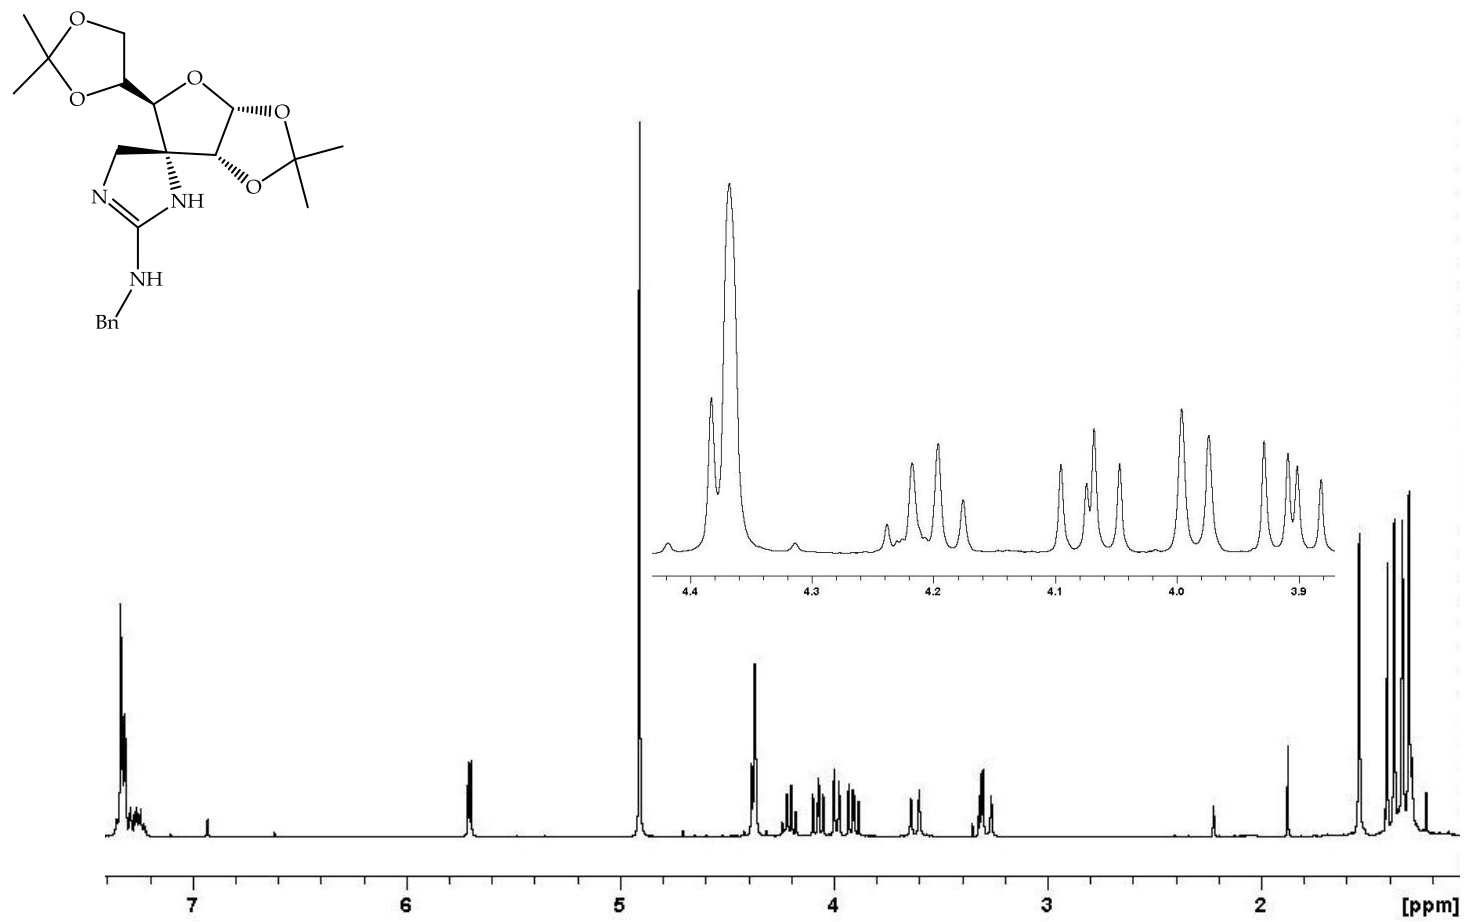

$^1\text{H-NMR}$  ( $\text{CD}_3\text{OD}$ , 300 MHz) of **9b**

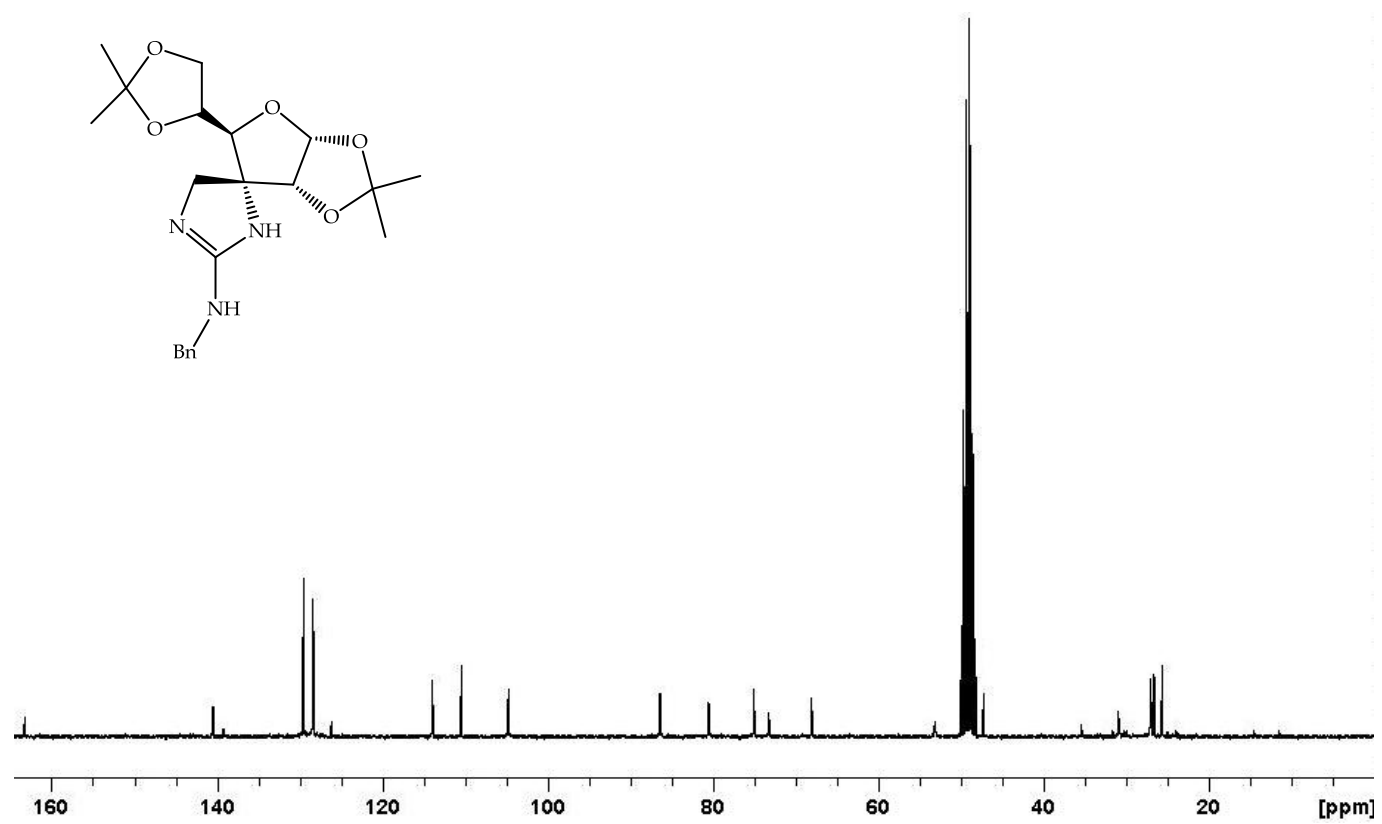

$^{13}\text{C}$ -NMR ( $\text{CD}_3\text{OD}$ , 75.5 MHz) of **9b**

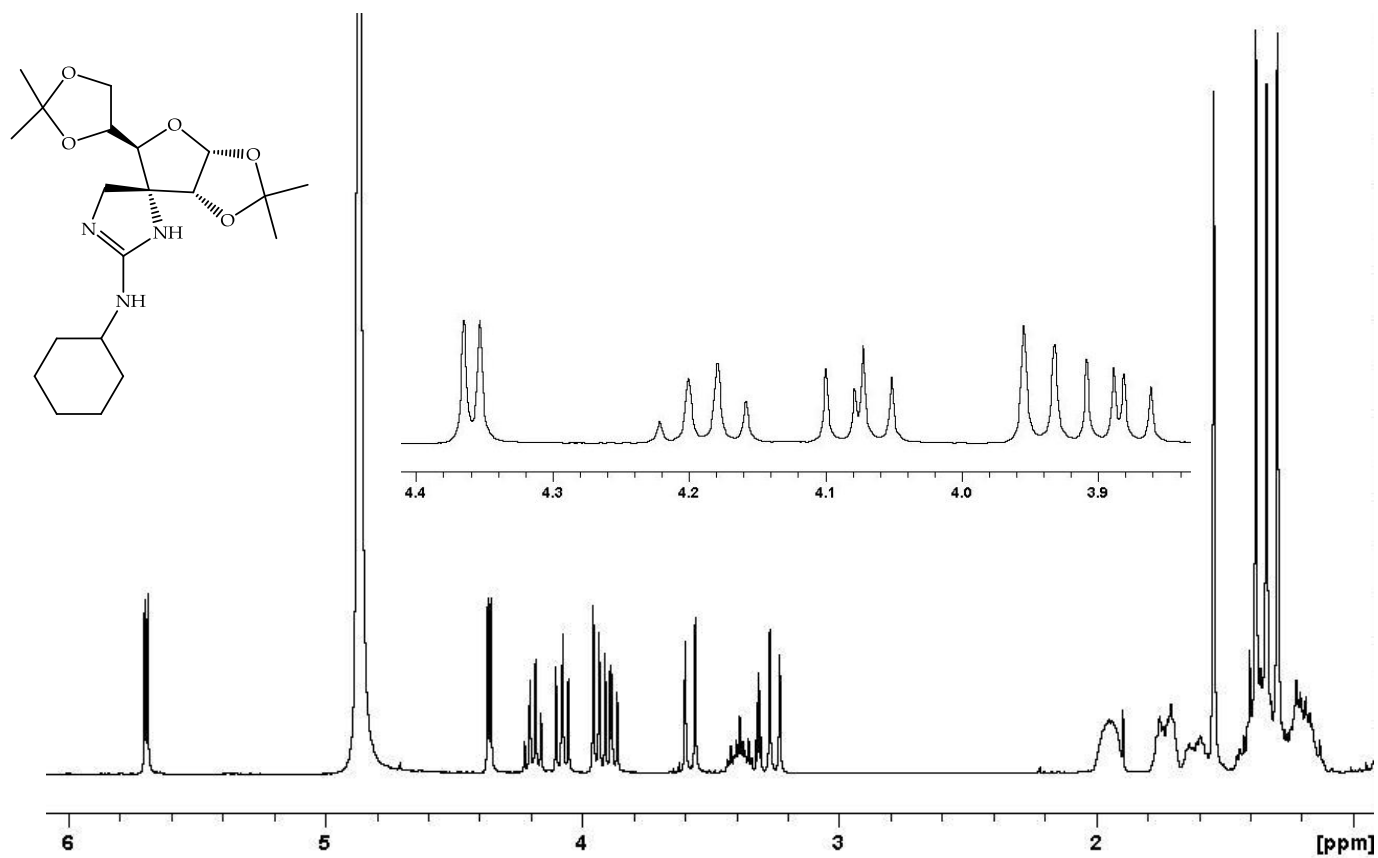

<sup>1</sup>H-NMR (CD<sub>3</sub>OD, 300 MHz) of **9c**

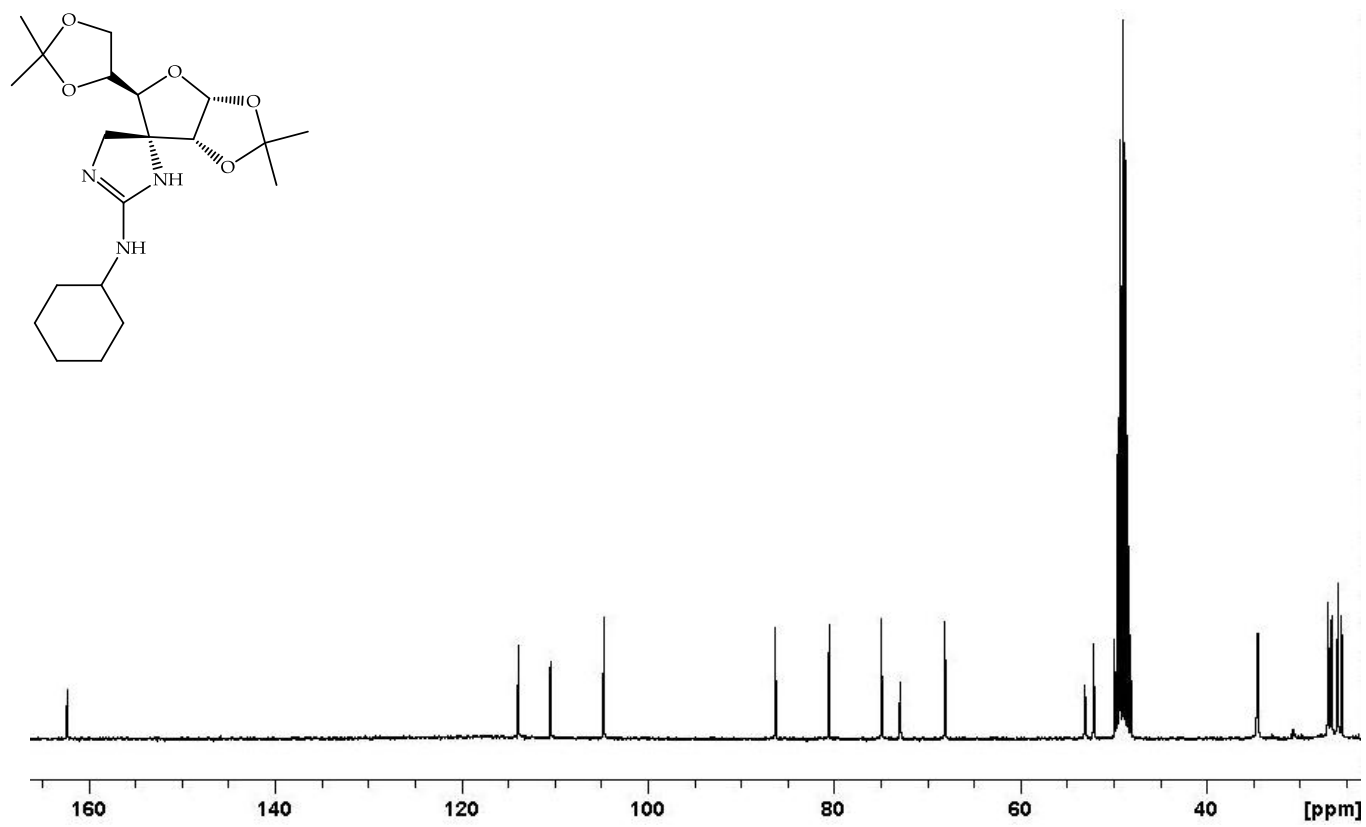

$^{13}\text{C}$ -NMR ( $\text{CD}_3\text{OD}$ , 75.5 MHz) of **9c**

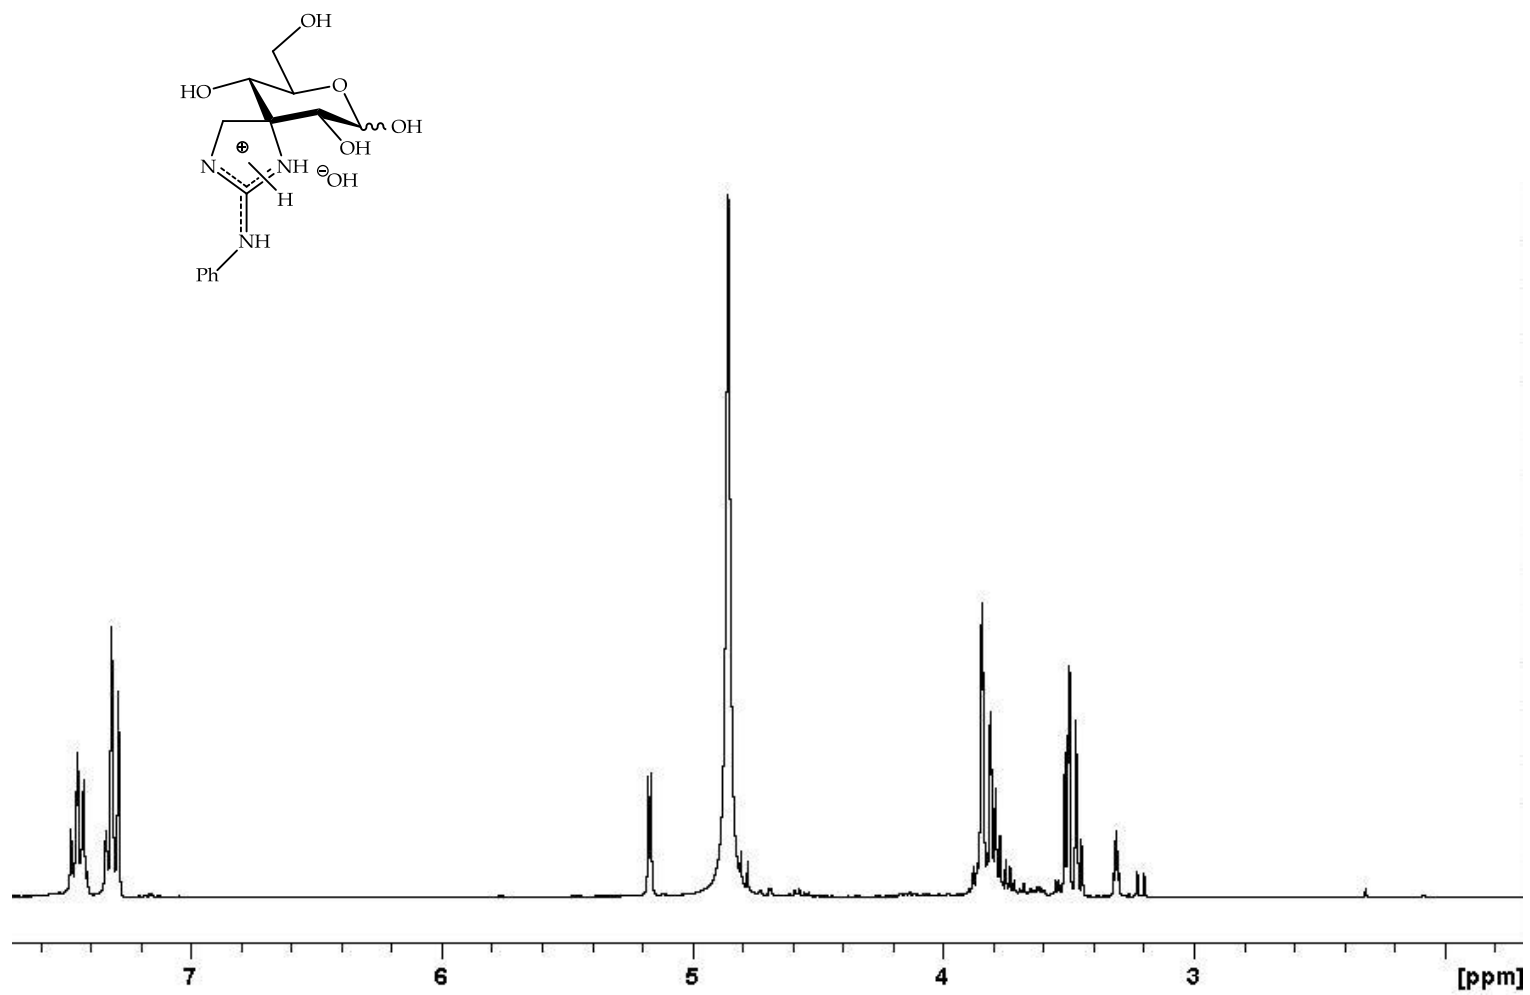

$^1\text{H-NMR}$  ( $\text{CD}_3\text{OD}$ , 300 MHz) of **6a**

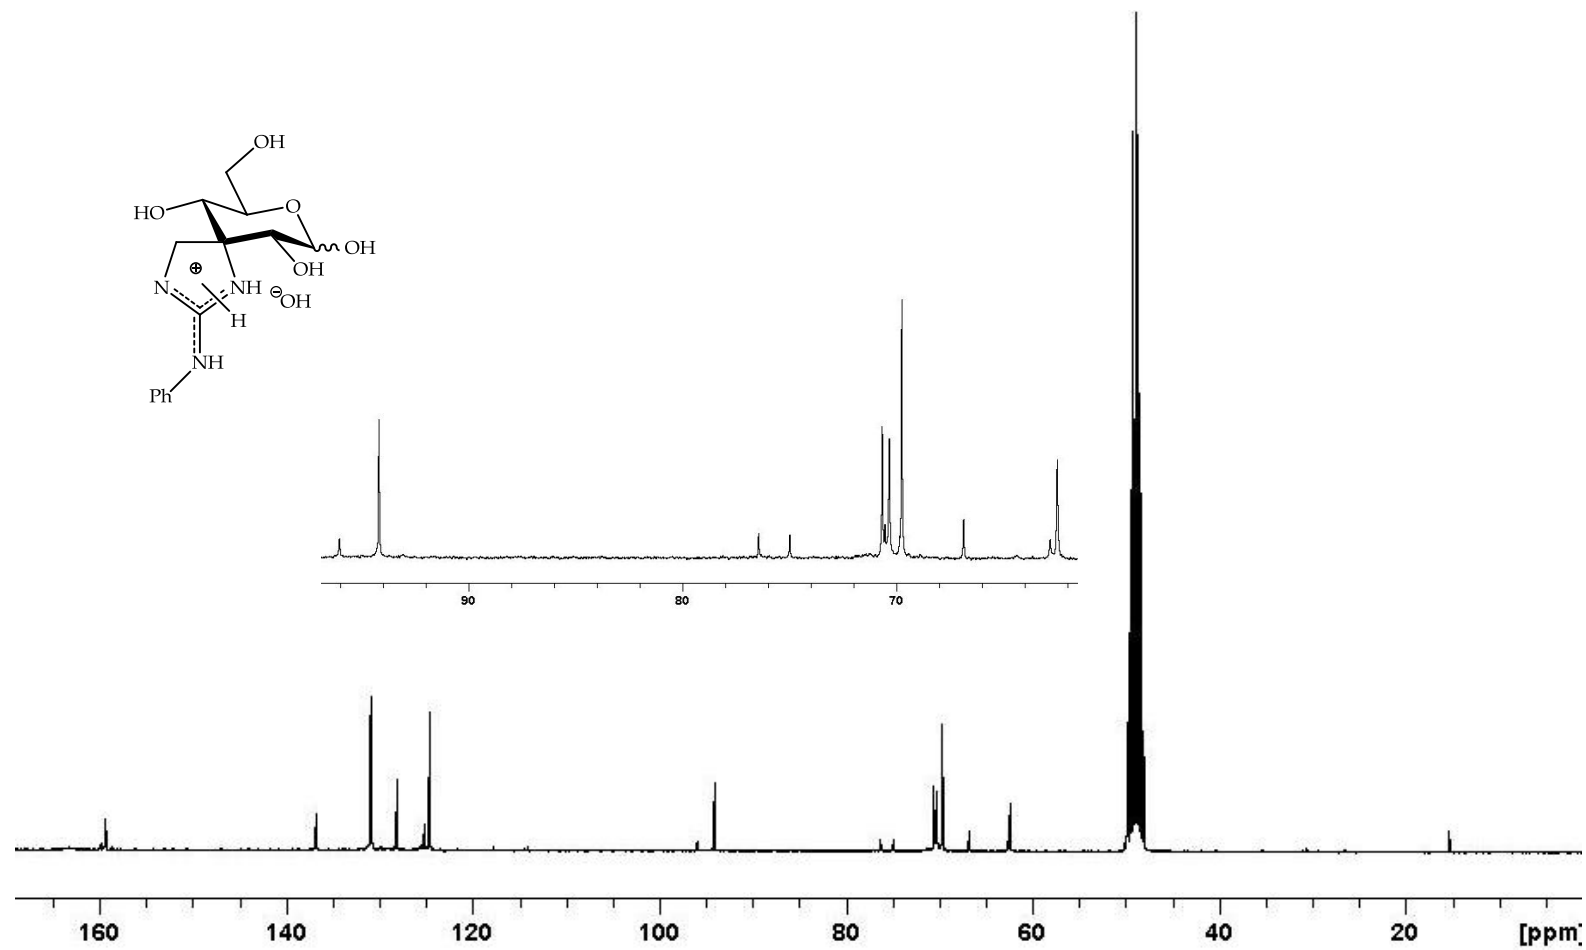

$^{13}\text{C}$ -NMR ( $\text{CD}_3\text{OD}$ , 75.5 MHz) of **6a**



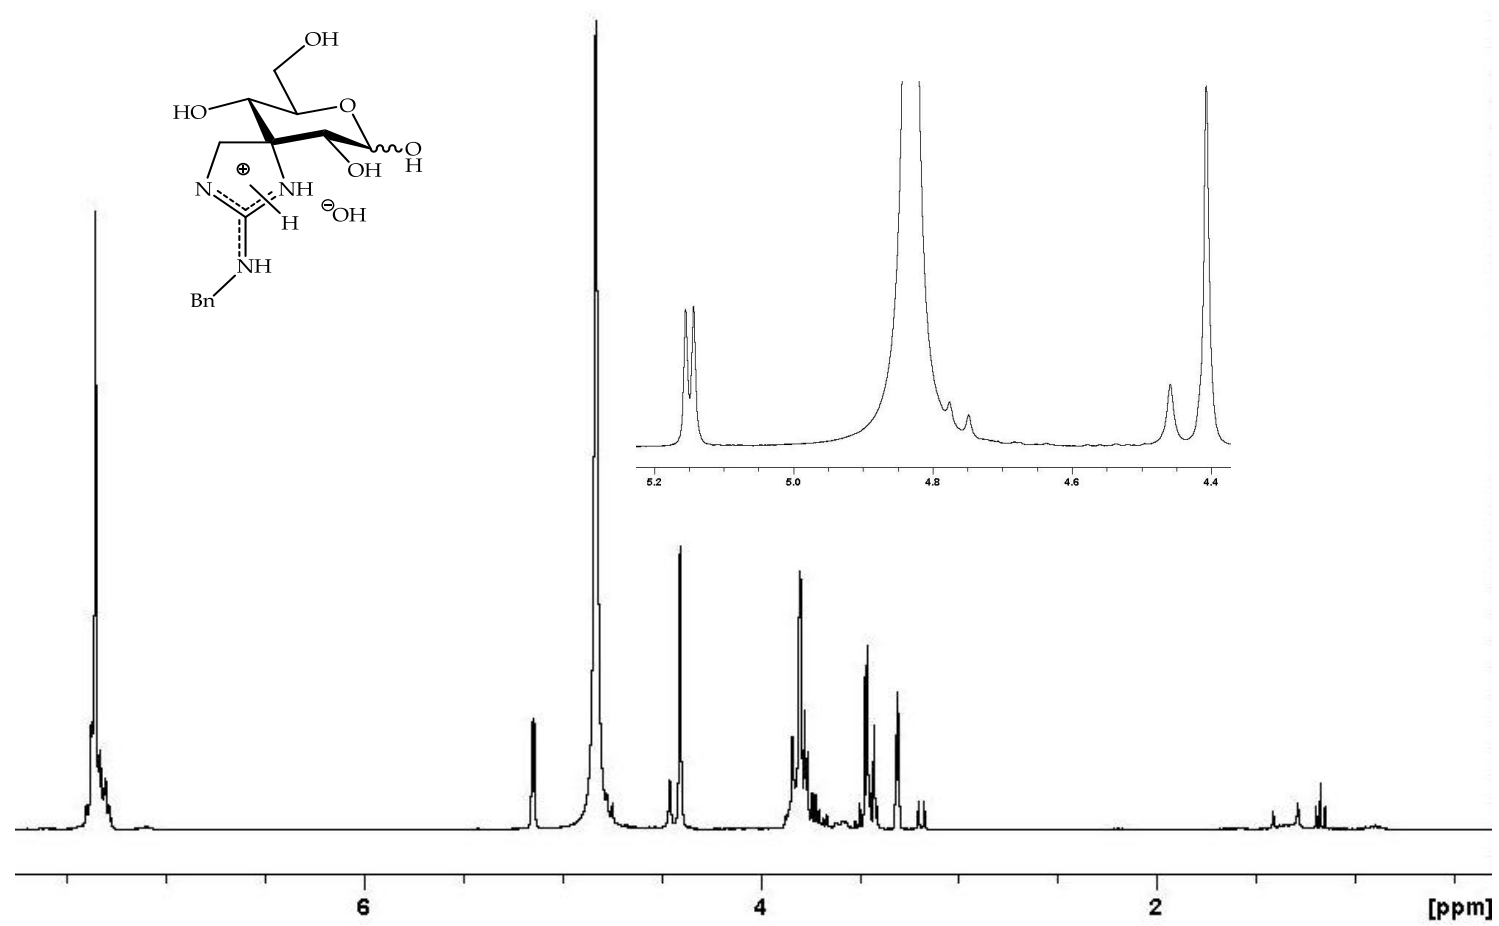

$^1\text{H-NMR}$  ( $\text{CD}_3\text{OD}$ , 300 MHz) of **6b**

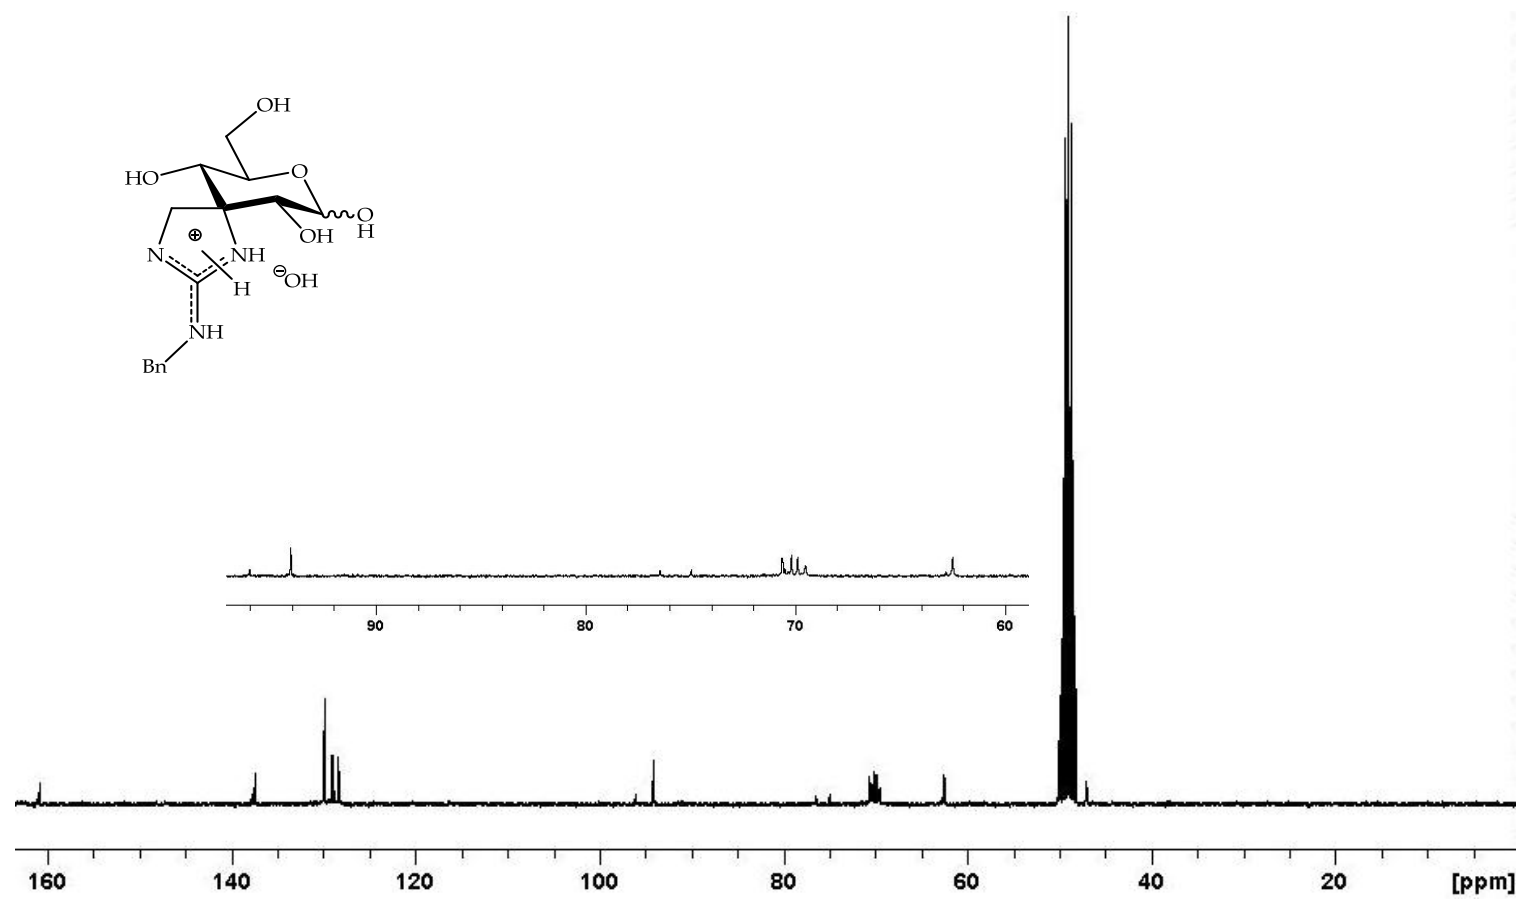

$^{13}\text{C}$ -NMR ( $\text{CD}_3\text{OD}$ , 75.5 MHz) of **6b**

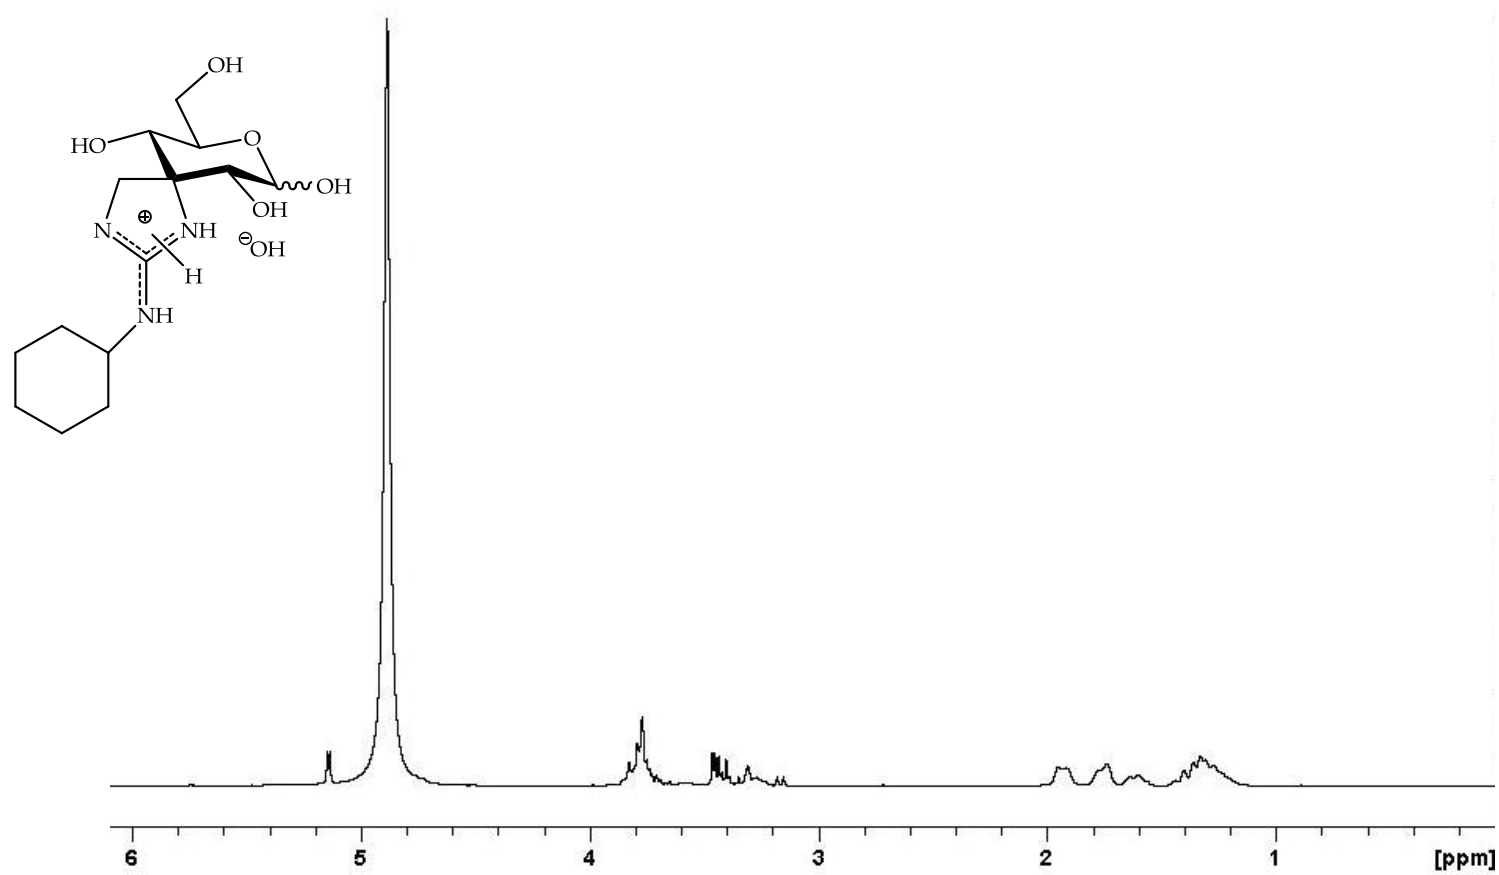

$^1\text{H-NMR}$  ( $\text{CD}_3\text{OD}$ , 300 MHz) of **6c**

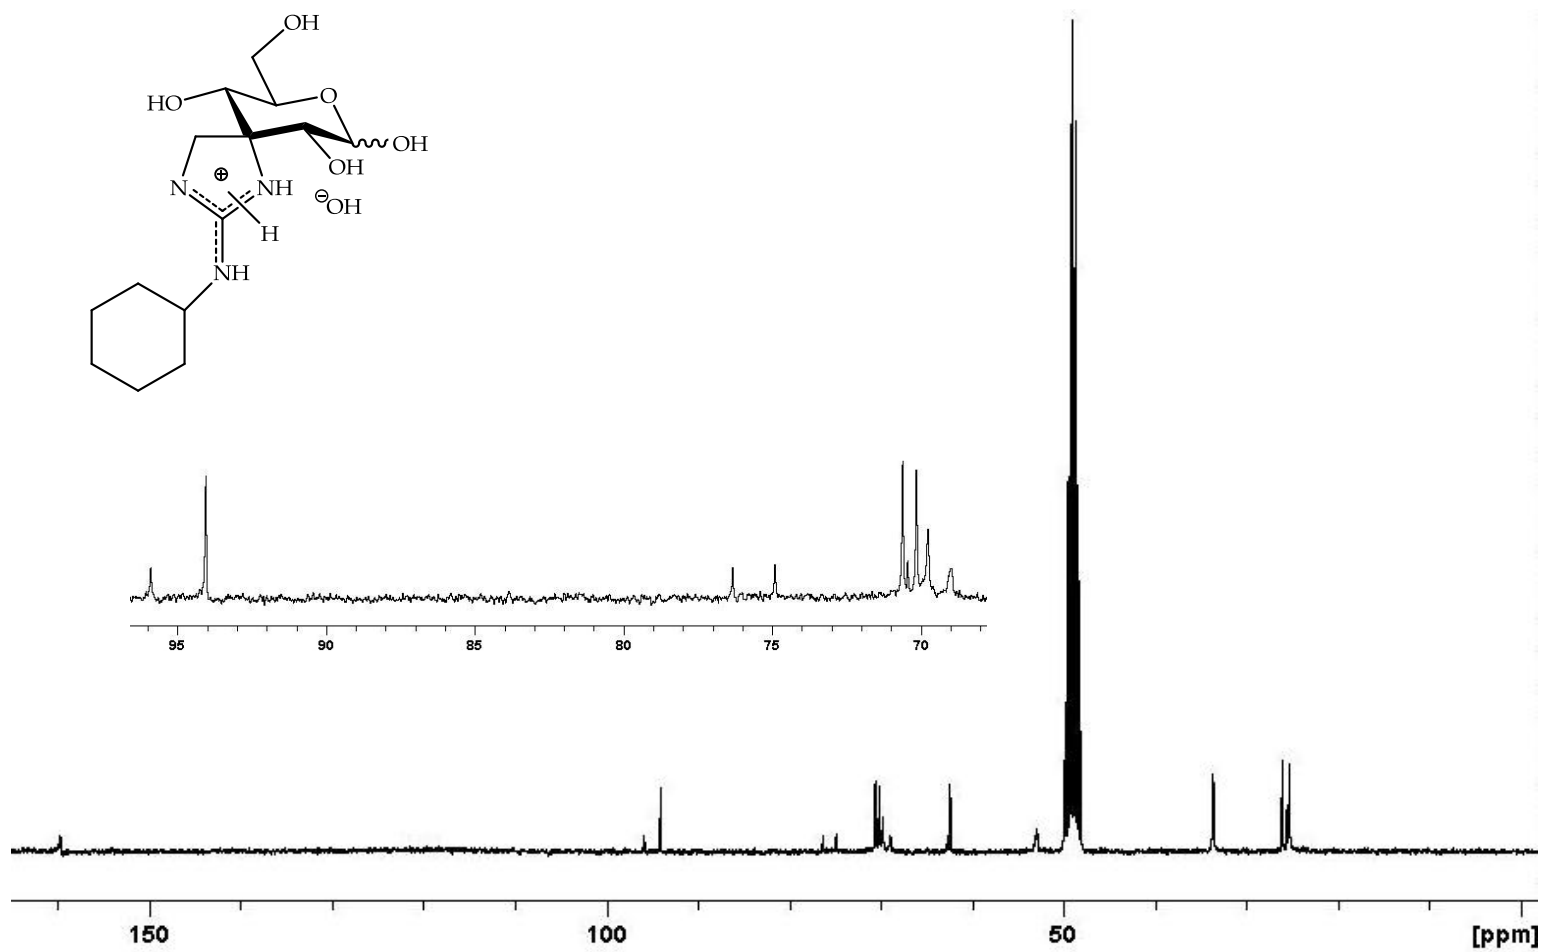

$^{13}\text{C}$ -NMR ( $\text{CD}_3\text{OD}$ , 75.5 MHz) of **6c**

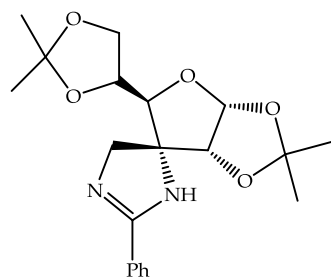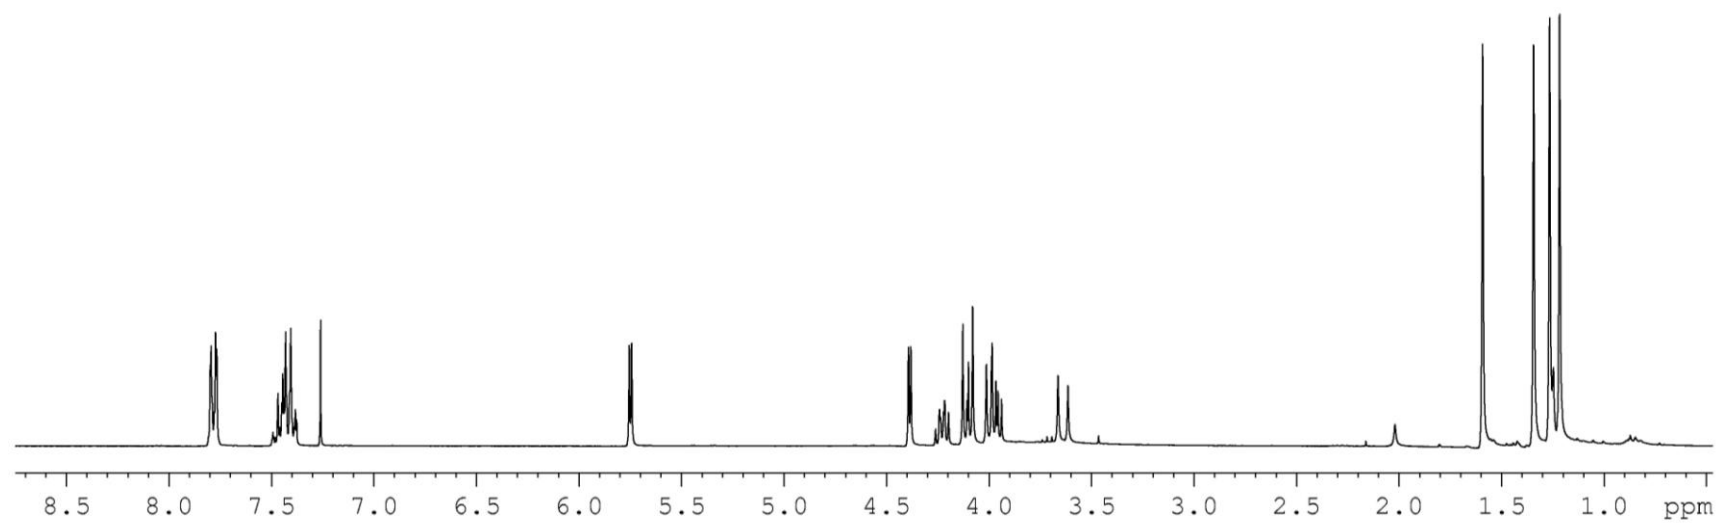

<sup>1</sup>H-NMR (CDCl<sub>3</sub>, 300 MHz) of **10a**

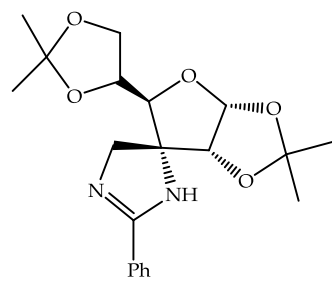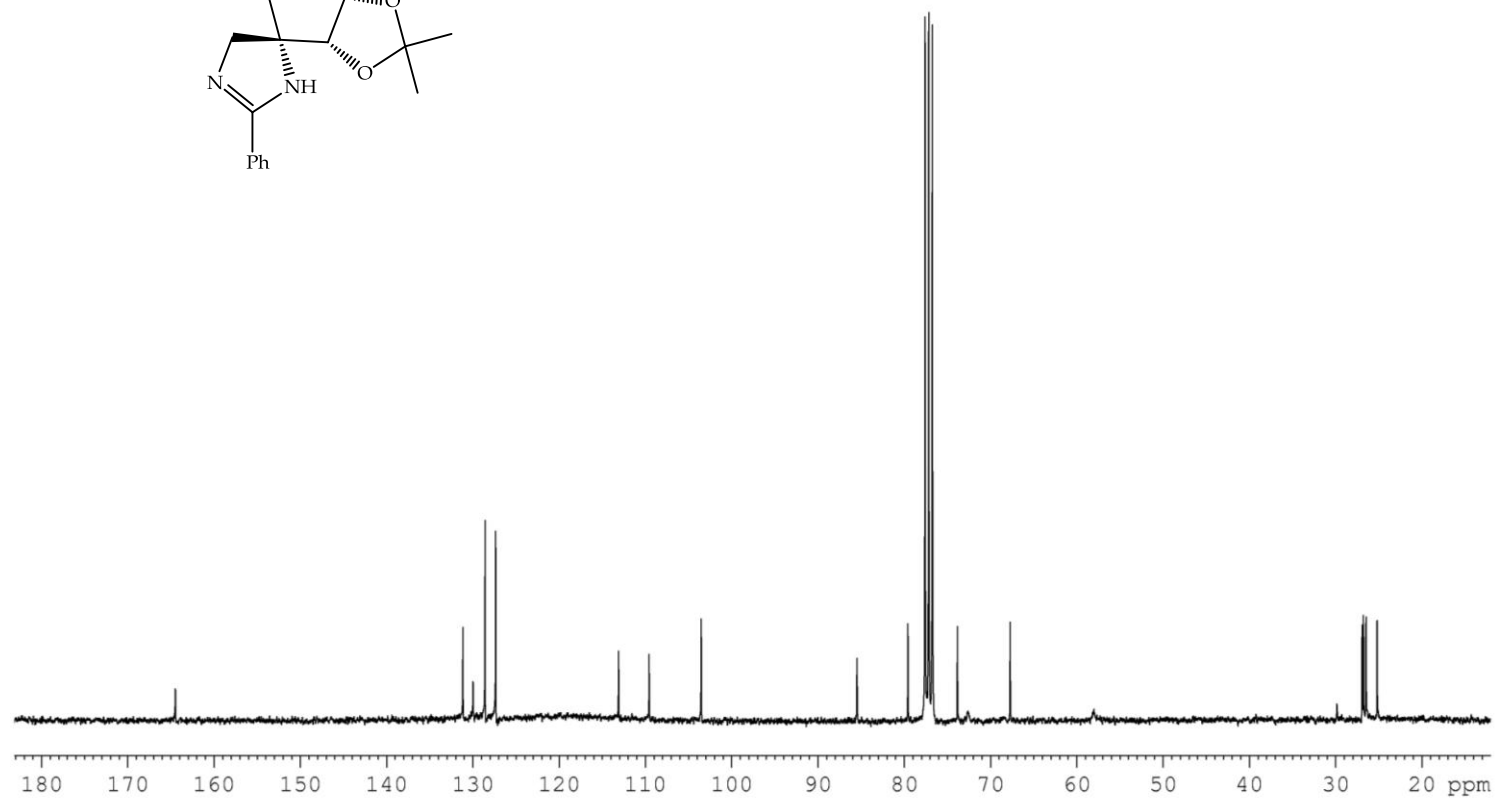

<sup>13</sup>C-NMR (CDCl<sub>3</sub>, 75.5 MHz) of **10a**

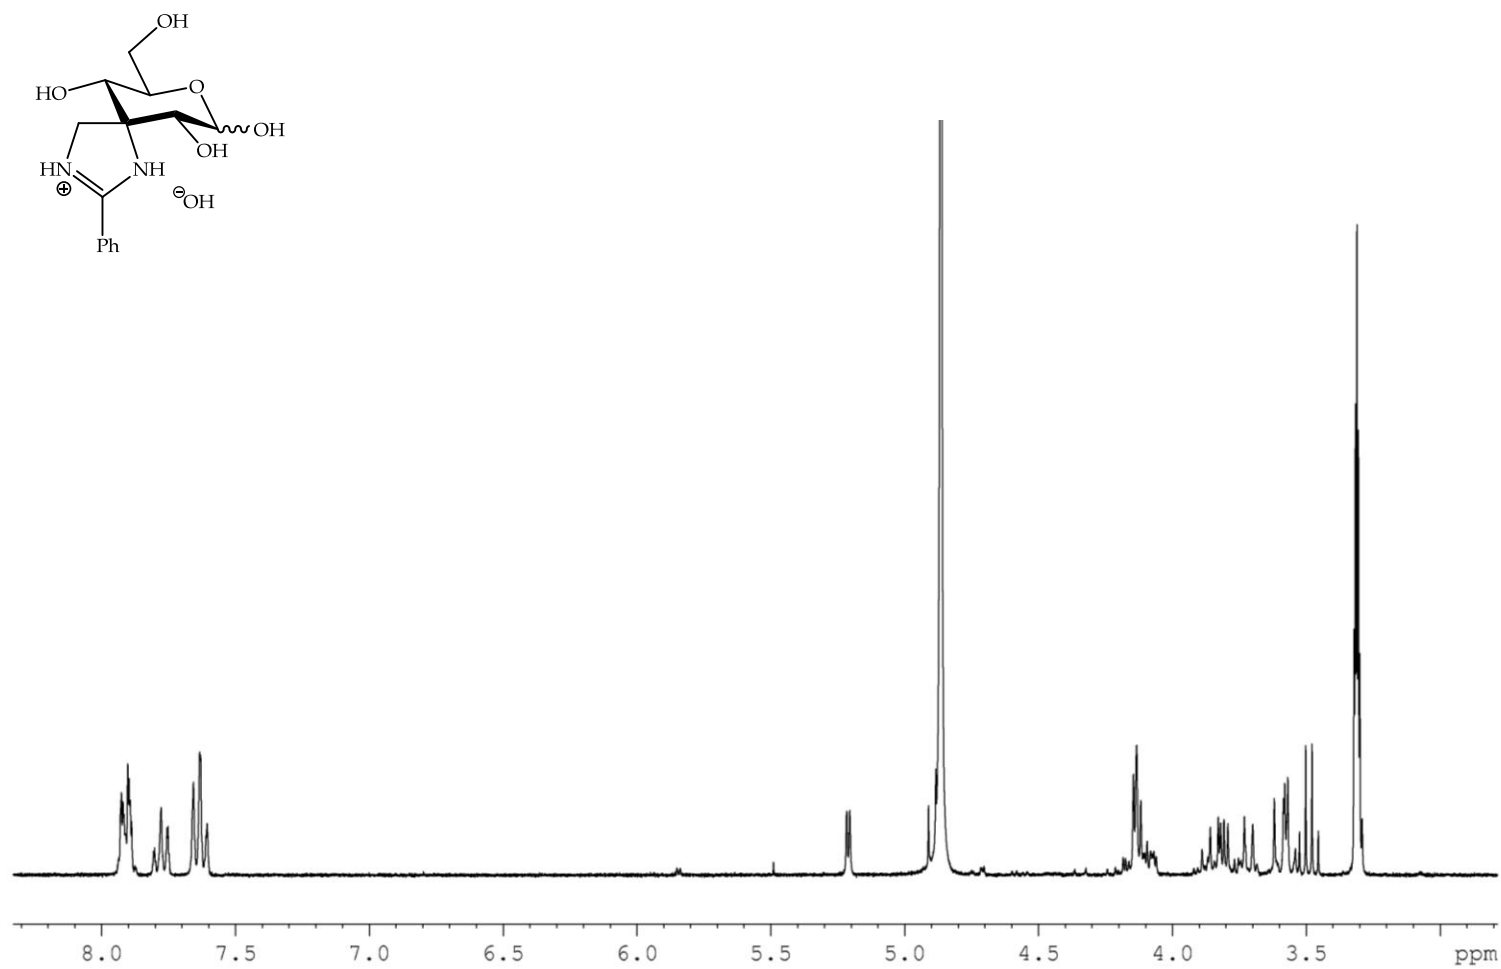

<sup>1</sup>H-NMR (CD<sub>3</sub>OD, 300 MHz) of **7a**

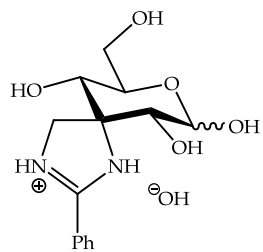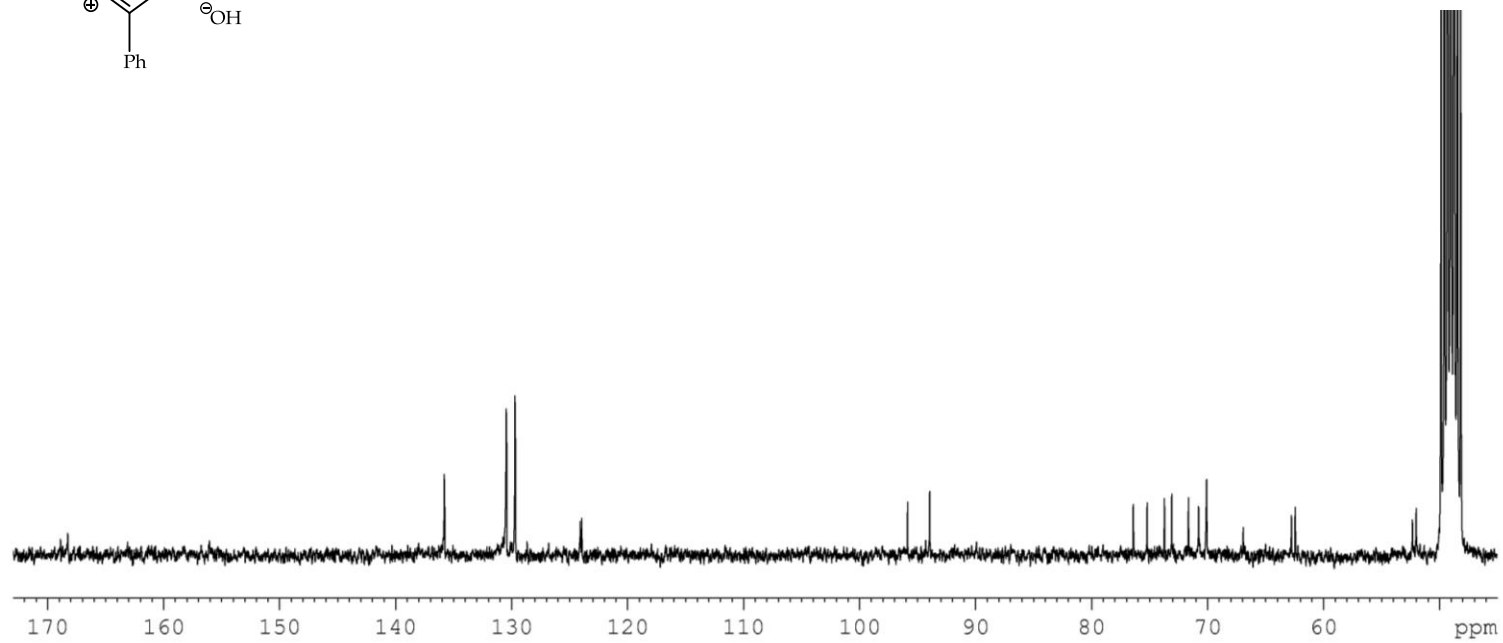

<sup>13</sup>C-NMR (CD<sub>3</sub>OD, 75.5 MHz) of **7a**



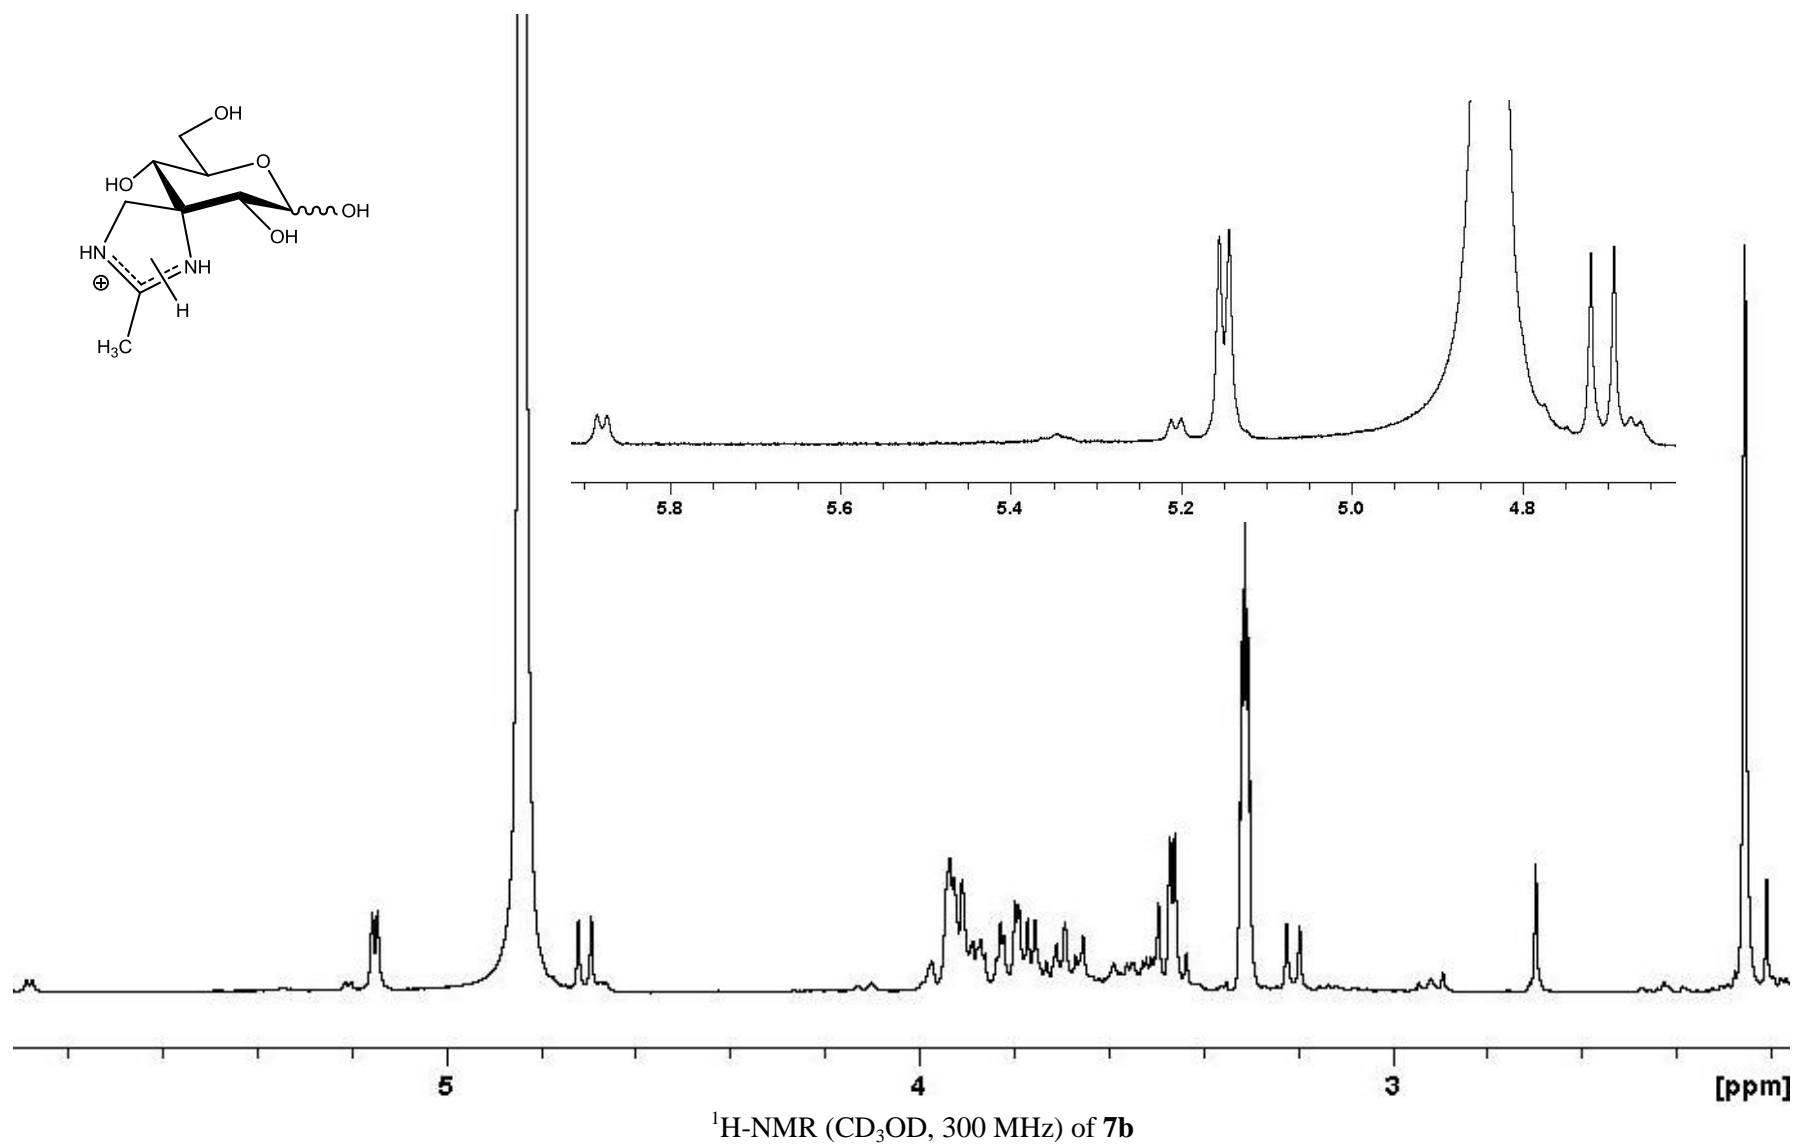

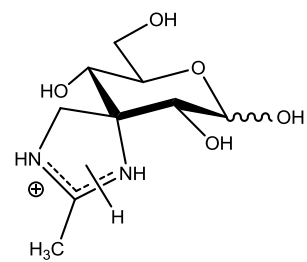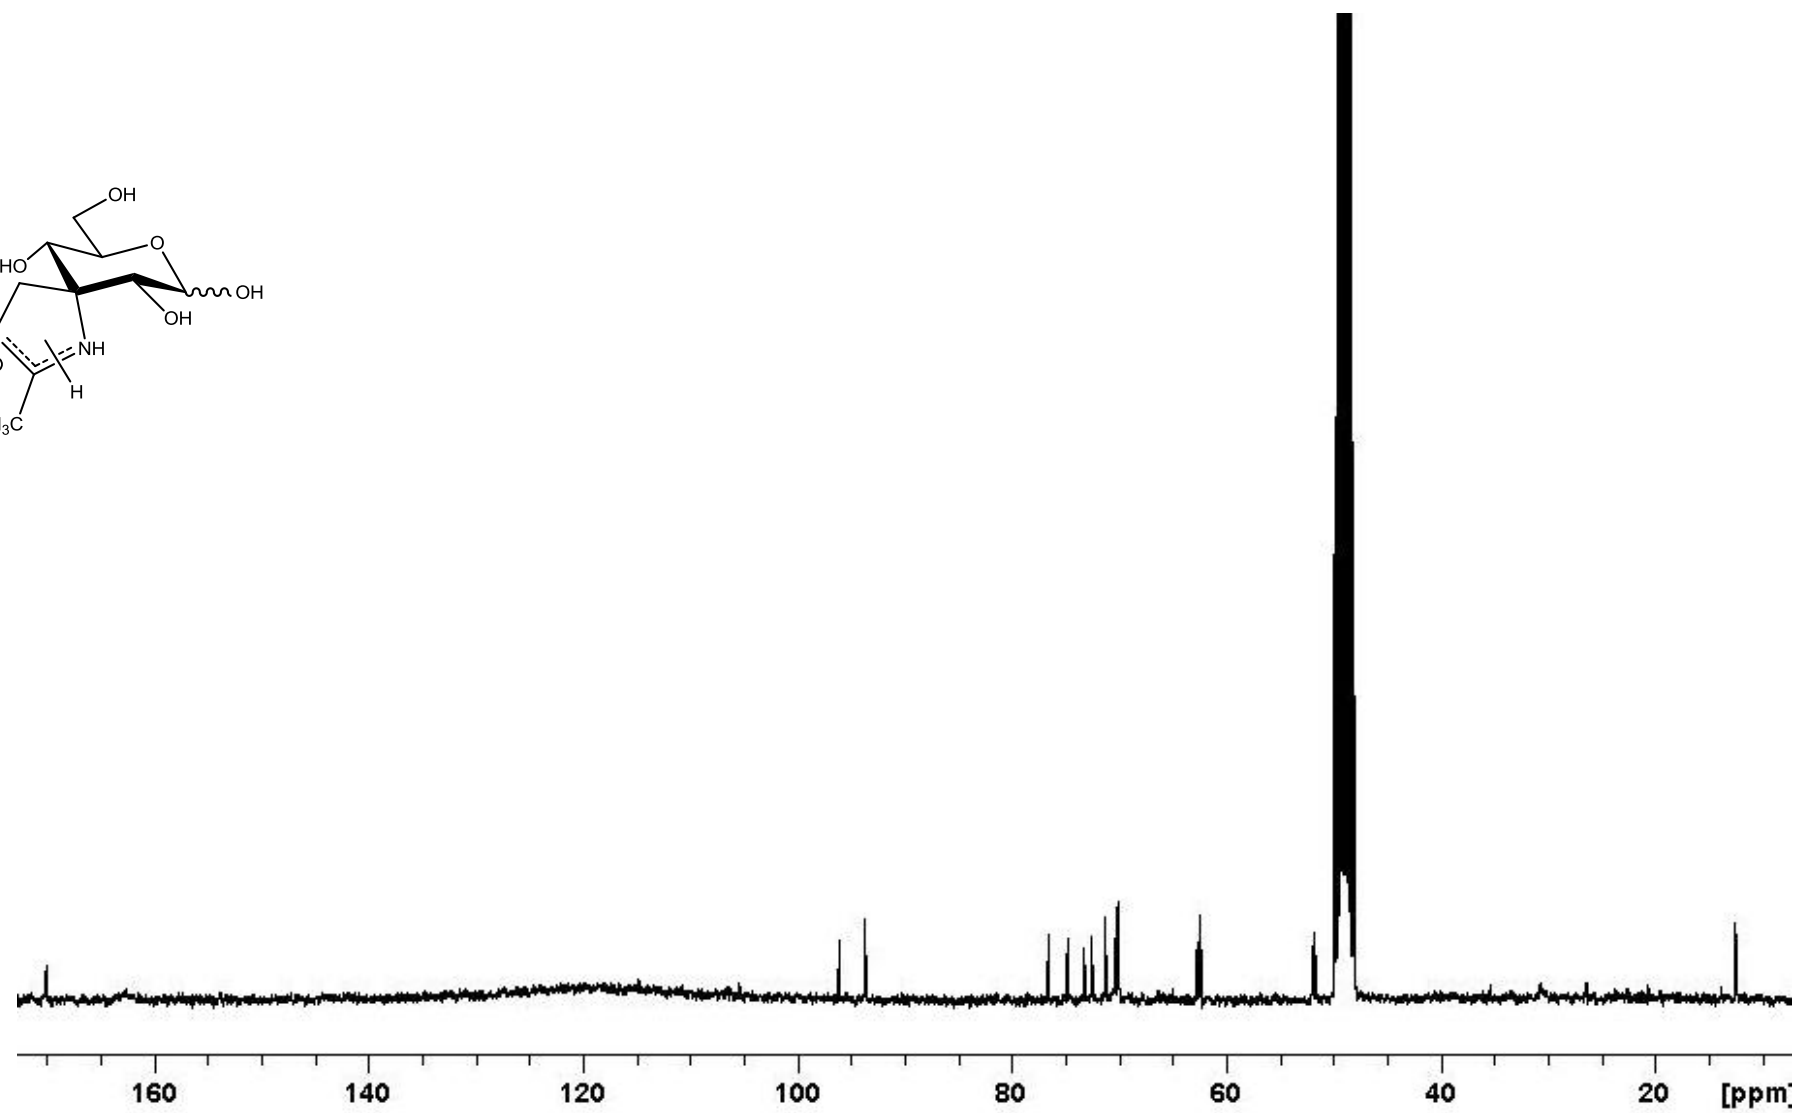

$^{13}\text{C}$ -NMR ( $\text{CD}_3\text{OD}$ , 75.5 MHz) of **7b**
